# Supplementary material for: Fine-Mapping the Wheat Snn1 Locus Conferring Sensitivity to the Parastagonospora nodorum Necrotrophic Effector SnTox1 Using an Eight Founder Multiparent Advanced Generation Inter-Cross Population
Source: PubMed Central journal article supplement (PMC4632045; doi:10.1534/g3.115.021584), 2015-09-24
Supplement: supp_g3.115.021584_021584SI.pdf [file supp_g3.115.021584_021584SI.pdf]

**Fine-mapping the wheat *Snn1* locus conferring insensitivity to the *Parastagonospora nodorum* necrotrophic effector SnTox1 using an eight founder multi-parent advanced generation intercross population**

James Cockram\*, Alice Scuderi\*<sup>§</sup>, Toby Barber\*, Eiko Furuki<sup>†</sup>, Keith A. Gardner\*, Nick Gosman\*<sup>1</sup>, Radoslaw Kowalczyk\*<sup>‡</sup>, Huyen P. Phan<sup>†</sup>, Gemma A. Rose\*, Kar-Chun Tan<sup>†</sup>, Richard P. Oliver<sup>†</sup>, Ian J. Mackay\*

\* John Bingham Laboratory, National Institute of Agricultural Botany (NIAB), Huntington Road, Cambridge, CB3 0LE, UK

§ SCIFAR Department, University of Messina, Messina, Sicily, Italy

† Centre for Crop Disease Management, Curtin University, WA6845, Australia

‡ Faculty of Life Sciences, University of Manchester, Manchester, M13 9PL, UK

<sup>1</sup> Current address: Bayer Crop Science NV, Ghent, Belgium

**Corresponding author:** NIAB, Huntington Road, Cambridge, CB3 0LE, UK. Email: james.cockram@niab.com

**DOI:** 10.1534/g3.115.021584

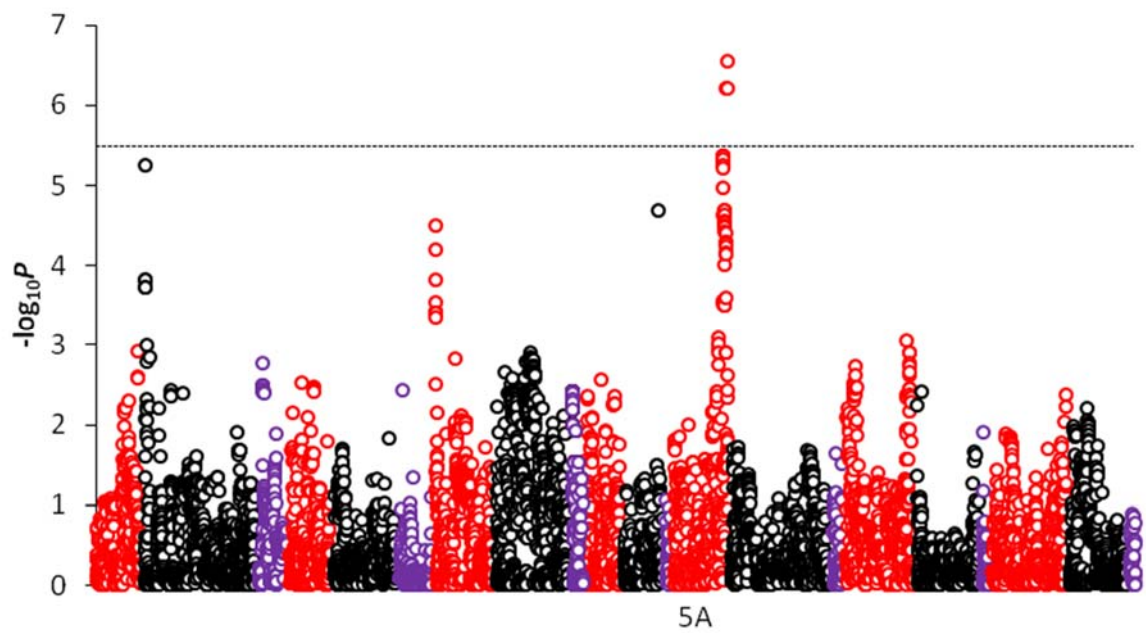

**Figure S1** QTL analysis for SnTox1 sensitivity, after inclusion of the peak 1B marker 'Excalibur\_c21898\_1423' as a covariate. SNPs mapping to the 21 wheat chromosomes are indicated in red (A genome), black (B genome) and purple (D genome). The Bonferroni corrected  $P = 0.05$  significance threshold is indicated (dashed line). Unmapped markers are not shown.

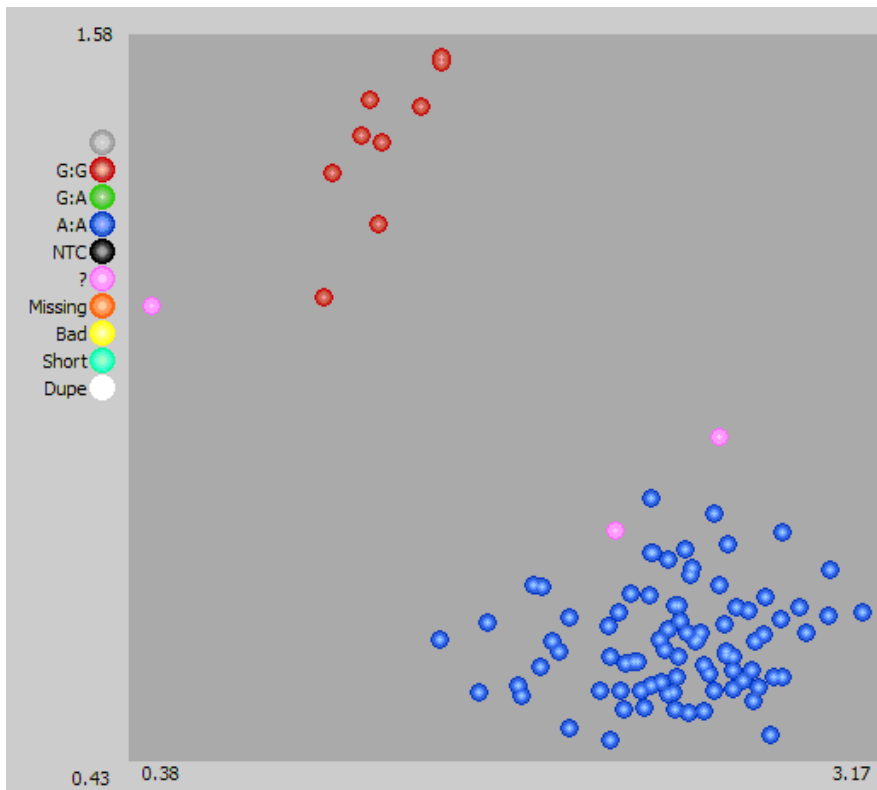

**Figure S2** Conversion of SNP BS00093078\_51 to the KASP genotyping platform. The assay was validated using a panel of 96 wheat varieties listed in Supplementary Table 3. Note, the KASP marker assays polymorphism on the opposite strand relative to the marker on the iSelect 90k array.

**Table S1** MAGIC lines screened for SnTox1 sensitivity. Adjusted phenotypic means listed.

| Variety     | Funnel | Plant | Line | Mean Tox1 score |
|-------------|--------|-------|------|-----------------|
| MEL_001-1b  | 1      | 1     | b    | 0.64            |
| MEL_001-2b  | 1      | 2     | b    | 2.68            |
| MEL_002-1   | 2      | 1     | a    | 0.78            |
| MEL_002-3   | 2      | 3     | a    | 2.35            |
| MEL_002-5-A | 2      | 5     | a    | 1.88            |
| MEL_002-7-B | 2      | 7     | a    | 1.30            |
| MEL_002-8   | 2      | 8     | a    | 0.65            |
| MEL_003-1c  | 3      | 1     | c    | 1.69            |
| MEL_004-1   | 4      | 1     | a    | 0.52            |
| MEL_004-2   | 4      | 2     | a    | 1.11            |
| MEL_004-3   | 4      | 3     | a    | 2.85            |
| MEL_004-5   | 4      | 5     | a    | 1.33            |
| MEL_005-3   | 5      | 3     | a    | 0.55            |
| MEL_005-5   | 5      | 5     | a    | 3.10            |
| MEL_005-7   | 5      | 7     | a    | 3.49            |
| MEL_005-8-A | 5      | 8     | a    | 1.25            |
| MEL_006-1   | 6      | 1     | a    | 0.80            |
| MEL_006-3   | 6      | 3     | a    | 2.82            |
| MEL_006-6   | 6      | 6     | a    | 0.13            |
| MEL_006-7   | 6      | 7     | a    | 2.12            |
| MEL_006-8   | 6      | 8     | a    | 1.61            |
| MEL_007-1b  | 7      | 1     | b    | 0.65            |
| MEL_007-2b  | 7      | 2     | b    | 1.42            |
| MEL_008-2   | 8      | 2     | a    | 0.24            |
| MEL_008-3   | 8      | 3     | a    | 0.43            |
| MEL_008-4   | 8      | 4     | a    | 0.47            |
| MEL_009b-2  | 009b   | 2     | a    | 0.33            |
| MEL_010-1aA | 10     | 1     | aA   | 0.47            |
| MEL_010-1b  | 10     | 1     | b    | 1.63            |
| MEL_010-3   | 10     | 3     | a    | 1.63            |
| MEL_010-5   | 10     | 5     | a    | 0.83            |
| MEL_011-1b  | 11     | 1     | b    | 1.67            |
| MEL_011-2a  | 11     | 2     | a    | 2.02            |
| MEL_011-3   | 11     | 3     | a    | 1.42            |
| MEL_012-1b  | 12     | 1     | b    | 2.25            |
| MEL_012-2b  | 12     | 2     | b    | 1.96            |
| MEL_012-3   | 12     | 3     | a    | 1.28            |
| MEL_012-4   | 12     | 4     | a    | 2.02            |
| MEL_013-1a  | 13     | 1     | a    | 0.43            |
| MEL_013-2c  | 13     | 2     | c    | 1.46            |
| MEL_014-2   | 14     | 2     | a    | 1.06            |
| MEL_014-4   | 14     | 4     | a    | 0.51            |
| MEL_014-7   | 14     | 7     | a    | 0.44            |
| MEL_014-8   | 14     | 8     | a    | 0.57            |
| MEL_015-2   | 15     | 2     | a    | 1.78            |
| MEL_015-3   | 15     | 3     | a    | 0.10            |
| MEL_015-7   | 15     | 7     | a    | 0.75            |
| MEL_016-1   | 16     | 1     | a    | 1.97            |
| MEL_016-4   | 16     | 4     | a    | 1.52            |
| MEL_016-6   | 16     | 6     | a    | 2.12            |
| MEL_016-7   | 16     | 7     | a    | 0.71            |
| MEL_017-4   | 17     | 4     | a    | 2.41            |
| MEL_017-6   | 17     | 6     | a    | 2.81            |
| MEL_017-7   | 17     | 7     | a    | 2.32            |
| MEL_018-1   | 18     | 1     | a    | 2.07            |
| MEL_018-2   | 18     | 2     | a    | 0.04            |
| MEL_019-1a  | 19     | 1     | a    | 1.17            |
| MEL_019-4   | 19     | 4     | a    | 0.76            |
| MEL_019-5   | 19     | 5     | a    | 1.24            |
| MEL_019-6-A | 19     | 6     | a    | 0.81            |

|              |    |   |   |       |
|--------------|----|---|---|-------|
| MEL_020-1-A  | 20 | 1 | a | 2.61  |
| MEL_020-3    | 20 | 3 | a | 2.19  |
| MEL_020-5    | 20 | 5 | a | 1.66  |
| MEL_020-7    | 20 | 7 | a | 1.36  |
| MEL_021-1    | 21 | 1 | a | 0.88  |
| MEL_021-2    | 21 | 2 | a | 0.34  |
| MEL_021-3    | 21 | 3 | a | 0.25  |
| MEL_021-7    | 21 | 7 | a | 1.39  |
| MEL_022-1c   | 22 | 1 | c | 2.13  |
| MEL_022-2b   | 22 | 2 | b | 0.87  |
| MEL_023-2    | 23 | 2 | a | 2.56  |
| MEL_023-4    | 23 | 4 | a | 4.00  |
| MEL_023-5    | 23 | 5 | a | 1.50  |
| MEL_023-6    | 23 | 6 | a | 0.84  |
| MEL_024-2    | 24 | 2 | a | 2.17  |
| MEL_025-1a-A | 25 | 1 | a | 1.96  |
| MEL_025-1b   | 25 | 1 | b | 1.01  |
| MEL_025-1c-A | 25 | 1 | c | 2.29  |
| MEL_025-1d   | 25 | 1 | d | 1.92  |
| MEL_025-1e   | 25 | 1 | e | 0.66  |
| MEL_025-1f   | 25 | 1 | f | 1.29  |
| MEL_026-1b   | 26 | 1 | b | 2.57  |
| MEL_027-1e   | 27 | 1 | e | 2.04  |
| MEL_028-1c   | 28 | 1 | c | 2.66  |
| MEL_029-1c   | 29 | 1 | c | 1.61  |
| MEL_029-2b   | 29 | 2 | b | 0.03  |
| MEL_030-1b   | 30 | 1 | b | 0.73  |
| MEL_030-2a   | 30 | 2 | a | 1.95  |
| MEL_031-1c   | 31 | 1 | c | 2.62  |
| MEL_031-2c   | 31 | 2 | c | 1.95  |
| MEL_032-1    | 32 | 1 | a | 0.66  |
| MEL_032-2    | 32 | 2 | a | 2.17  |
| MEL_032-5    | 32 | 5 | a | 2.58  |
| MEL_032-6    | 32 | 6 | a | -0.34 |
| MEL_032-8    | 32 | 8 | a | 1.95  |
| MEL_033-1-A  | 33 | 1 | a | 1.07  |
| MEL_033-2    | 33 | 2 | a | 0.51  |
| MEL_033-4    | 33 | 4 | a | 2.06  |
| MEL_033-5    | 33 | 5 | a | 2.03  |
| MEL_033-7    | 33 | 7 | a | 2.44  |
| MEL_034-4    | 34 | 4 | a | 2.14  |
| MEL_034-5    | 34 | 5 | a | 0.15  |
| MEL_034-6    | 34 | 6 | a | 0.65  |
| MEL_034-7    | 34 | 7 | a | 0.70  |
| MEL_035-1    | 35 | 1 | a | 2.46  |
| MEL_035-2    | 35 | 2 | a | 0.76  |
| MEL_035-3    | 35 | 3 | a | 0.81  |
| MEL_035-7    | 35 | 7 | a | 2.42  |
| MEL_035-8    | 35 | 8 | a | 1.95  |
| MEL_036-1b   | 36 | 1 | b | 0.87  |
| MEL_036-3    | 36 | 3 | a | 3.20  |
| MEL_036-8    | 36 | 8 | a | 0.67  |
| MEL_037-1a   | 37 | 1 | a | 2.93  |
| MEL_037-2a   | 37 | 2 | a | 1.50  |
| MEL_038-1a   | 38 | 1 | a | 1.86  |
| MEL_038-2b   | 38 | 2 | b | -0.12 |
| MEL_039-1e   | 39 | 1 | e | 1.44  |
| MEL_040-1c   | 40 | 1 | c | 2.17  |
| MEL_040-2c   | 40 | 2 | c | 2.30  |
| MEL_041-1c   | 41 | 1 | c | 2.41  |
| MEL_041-2c   | 41 | 2 | c | 1.07  |
| MEL_042-1b   | 42 | 1 | b | 1.77  |
| MEL_043-1    | 43 | 1 | a | 3.21  |

---

|             |      |   |    |      |
|-------------|------|---|----|------|
| MEL_043-2   | 43   | 2 | a  | 1.93 |
| MEL_043-3   | 43   | 3 | a  | 2.18 |
| MEL_043-5   | 43   | 5 | a  | 1.23 |
| MEL_043-6   | 43   | 6 | a  | 2.65 |
| MEL_043-7   | 43   | 7 | a  | 1.52 |
| MEL_044a-1  | 044a | 1 | a  | 1.25 |
| MEL_044a-2  | 044a | 2 | a  | 1.96 |
| MEL_044a-4  | 044a | 4 | a  | 3.08 |
| MEL_044b-1b | 044b | 1 | b  | 2.02 |
| MEL_045-1b  | 45   | 1 | b  | 0.64 |
| MEL_046-1   | 46   | 1 | a  | 0.78 |
| MEL_046-2   | 46   | 2 | a  | 1.60 |
| MEL_046-7   | 46   | 7 | a  | 1.39 |
| MEL_047a-1  | 047a | 1 | a  | 0.38 |
| MEL_047a-3  | 047a | 3 | a  | 1.37 |
| MEL_047b-1a | 047b | 1 | a  | 1.55 |
| MEL_048-1a  | 48   | 1 | a  | 0.97 |
| MEL_048-1c  | 48   | 1 | c  | 1.32 |
| MEL_049-2   | 49   | 2 | a  | 0.61 |
| MEL_049-5   | 49   | 5 | a  | U    |
| MEL_050-1   | 50   | 1 | a  | 0.55 |
| MEL_050-5   | 50   | 5 | a  | 1.35 |
| MEL_050-6   | 50   | 6 | a  | 1.09 |
| MEL_051-1d  | 51   | 1 | d  | 1.92 |
| MEL_052-1   | 52   | 1 | a  | 1.22 |
| MEL_052-3   | 52   | 3 | a  | 0.61 |
| MEL_052-5   | 52   | 5 | a  | 0.56 |
| MEL_052-7-A | 52   | 7 | a  | 0.92 |
| MEL_052-8-A | 52   | 8 | a  | 1.62 |
| MEL_053-1aA | 53   | 1 | aA | 0.08 |
| MEL_053-2aB | 53   | 2 | aB | 2.52 |
| MEL_053-3   | 53   | 3 | a  | 1.03 |
| MEL_054-1A  | 54   | 1 | A  | 1.06 |
| MEL_054-2   | 54   | 2 | a  | 1.86 |
| MEL_054-3A  | 54   | 3 | A  | 1.32 |
| MEL_054-7   | 54   | 7 | a  | 0.83 |
| MEL_054-8   | 54   | 8 | a  | 2.09 |
| MEL_055-1aA | 55   | 1 | aA | 1.50 |
| MEL_055-2b  | 55   | 2 | b  | 2.03 |
| MEL_056-1   | 56   | 1 | a  | 2.82 |
| MEL_056-4   | 56   | 4 | a  | 2.03 |
| MEL_056-5   | 56   | 5 | a  | 0.99 |
| MEL_056-6   | 56   | 6 | a  | 2.40 |
| MEL_057-1a  | 57   | 1 | a  | 1.41 |
| MEL_057-3   | 57   | 3 | a  | 0.01 |
| MEL_058-1   | 58   | 1 | a  | 1.08 |
| MEL_058-2   | 58   | 2 | a  | 1.54 |
| MEL_058-4   | 58   | 4 | a  | 1.95 |
| MEL_059-1a  | 59   | 1 | a  | 0.95 |
| MEL_059-1b  | 59   | 1 | b  | 0.86 |
| MEL_059-1c  | 59   | 1 | c  | 1.52 |
| MEL_059-1d  | 59   | 1 | d  | 2.03 |
| MEL_059-1e  | 59   | 1 | e  | 1.97 |
| MEL_059-1f  | 59   | 1 | f  | 2.06 |
| MEL_060-1a  | 60   | 1 | a  | 1.37 |
| MEL_060-1b  | 60   | 1 | b  | 0.63 |
| MEL_060-2bA | 60   | 2 | b  | 2.83 |
| MEL_060-3   | 60   | 3 | a  | 0.47 |
| MEL_060-4   | 60   | 4 | a  | 1.94 |
| MEL_061-1   | 61   | 1 | a  | 0.79 |
| MEL_061-2   | 61   | 2 | a  | 0.37 |
| MEL_061-4A  | 61   | 4 | A  | 0.22 |
| MEL_061-7   | 61   | 7 | a  | 1.45 |

---

|             |      |   |    |       |
|-------------|------|---|----|-------|
| MEL_062-1a  | 62   | 1 | a  | 2.33  |
| MEL_062-2   | 62   | 2 | a  | 0.26  |
| MEL_062-3   | 62   | 3 | a  | 0.52  |
| MEL_063a-2  | 063a | 2 | a  | 0.54  |
| MEL_063b-1  | 063b | 1 | a  | 1.67  |
| MEL_064-1a  | 64   | 1 | a  | 1.10  |
| MEL_064-1c  | 64   | 1 | c  | 1.22  |
| MEL_064-1d  | 64   | 1 | d  | 0.10  |
| MEL_064-1e  | 64   | 1 | e  | 2.32  |
| MEL_064-1f  | 64   | 1 | f  | 0.62  |
| MEL_065-1c  | 65   | 1 | c  | 1.52  |
| MEL_065-2b  | 65   | 2 | b  | 1.78  |
| MEL_070-1c  | 70   | 1 | c  | 2.21  |
| MEL_071-1a  | 71   | 1 | a  | 2.50  |
| MEL_071-1b  | 71   | 1 | b  | 0.20  |
| MEL_071-1c  | 71   | 1 | c  | 1.04  |
| MEL_071-1e  | 71   | 1 | e  | 1.98  |
| MEL_071-1f  | 71   | 1 | f  | 0.43  |
| MEL_072-1a  | 72   | 1 | a  | 1.32  |
| MEL_072-1b  | 72   | 1 | b  | 3.04  |
| MEL_072-1c  | 72   | 1 | c  | 2.43  |
| MEL_072-1d  | 72   | 1 | d  | 2.10  |
| MEL_072-1e  | 72   | 1 | e  | 0.40  |
| MEL_072-1f  | 72   | 1 | f  | 2.60  |
| MEL_073-3A  | 73   | 3 | A  | 2.14  |
| MEL_073-6   | 73   | 6 | a  | 1.78  |
| MEL_073-8   | 73   | 8 | a  | 2.55  |
| MEL_074-3   | 74   | 3 | a  | 2.12  |
| MEL_074-5   | 74   | 5 | a  | 1.32  |
| MEL_075-1b  | 75   | 1 | b  | 1.37  |
| MEL_075-2b  | 75   | 2 | b  | 1.51  |
| MEL_075-3   | 75   | 3 | a  | -0.01 |
| MEL_075-4   | 75   | 4 | a  | 2.17  |
| MEL_076-1d  | 76   | 1 | d  | 0.97  |
| MEL_077-4   | 77   | 4 | a  | 1.22  |
| MEL_078-1cA | 78   | 1 | cA | 1.38  |
| MEL_081-1a  | 81   | 1 | a  | 0.85  |
| MEL_081-3   | 81   | 3 | a  | 1.44  |
| MEL_081-4   | 81   | 4 | a  | 2.25  |
| MEL_081-5   | 81   | 5 | a  | 0.92  |
| MEL_082-1aA | 82   | 1 | aA | 1.39  |
| MEL_082-1b  | 82   | 1 | b  | 1.70  |
| MEL_082-2   | 82   | 2 | a  | 2.61  |
| MEL_083-1   | 83   | 1 | a  | 1.12  |
| MEL_084-7   | 84   | 7 | a  | 0.27  |
| MEL_085-2b  | 85   | 2 | b  | 1.75  |
| MEL_085-4   | 85   | 4 | a  | 2.32  |
| MEL_086-3   | 86   | 3 | a  | 1.13  |
| MEL_086-7   | 86   | 7 | a  | 2.46  |
| MEL_087-1c  | 87   | 1 | c  | 1.97  |
| MEL_088-1   | 88   | 1 | a  | 2.11  |
| MEL_088-3   | 88   | 3 | a  | 2.50  |
| MEL_088-7   | 88   | 7 | a  | 0.47  |
| MEL_089-1a  | 89   | 1 | a  | 1.48  |
| MEL_089-2a  | 89   | 2 | a  | 1.50  |
| MEL_089-4   | 89   | 4 | a  | 1.99  |
| MEL_090-1a  | 90   | 1 | a  | 1.98  |
| MEL_090-2c  | 90   | 2 | c  | 1.11  |
| MEL_091-2   | 91   | 2 | a  | 2.50  |
| MEL_091-3   | 91   | 3 | a  | 3.38  |
| MEL_091-4   | 91   | 4 | a  | 0.76  |
| MEL_091-5   | 91   | 5 | a  | 1.39  |
| MEL_092-1   | 92   | 1 | a  | 1.99  |

---

|            |      |   |   |      |
|------------|------|---|---|------|
| MEL_092-3  | 92   | 3 | a | 0.01 |
| MEL_092-4  | 92   | 4 | a | 2.66 |
| MEL_092-6  | 92   | 6 | a | 0.49 |
| MEL_093-2  | 93   | 2 | a | 1.47 |
| MEL_093-3  | 93   | 3 | a | 1.88 |
| MEL_093-4  | 93   | 4 | a | 1.67 |
| MEL_093-6  | 93   | 6 | a | 1.32 |
| MEL_093-7  | 93   | 7 | a | 0.79 |
| MEL_094-1c | 94   | 1 | c | 0.79 |
| MEL_095-1  | 95   | 1 | a | 1.49 |
| MEL_095-2  | 95   | 2 | a | 0.37 |
| MEL_095-6  | 95   | 6 | a | 2.51 |
| MEL_095-7A | 95   | 7 | A | 1.97 |
| MEL_095-8B | 95   | 8 | B | 1.78 |
| MEL_096-1a | 96   | 1 | a | 0.81 |
| MEL_096-2  | 96   | 2 | a | 1.98 |
| MEL_096-4  | 96   | 4 | a | 1.95 |
| MEL_096-5  | 96   | 5 | a | 0.38 |
| MEL_096-6  | 96   | 6 | a | 1.13 |
| MEL_097-1  | 97   | 1 | a | 1.60 |
| MEL_097-2A | 97   | 2 | A | 1.81 |
| MEL_097-3A | 97   | 3 | A | 1.29 |
| MEL_097-5  | 97   | 5 | a | 2.25 |
| MEL_097-6  | 97   | 6 | a | 1.83 |
| MEL_098-1  | 98   | 1 | a | 2.67 |
| MEL_098-2  | 98   | 2 | a | 1.74 |
| MEL_098-5B | 98   | 5 | B | 0.68 |
| MEL_099-2  | 99   | 2 | a | 2.19 |
| MEL_099-5  | 99   | 5 | a | 1.39 |
| MEL_099-8  | 99   | 8 | a | U    |
| MEL_100-1b | 100  | 1 | b | 0.74 |
| MEL_100-2b | 100  | 2 | b | 1.58 |
| MEL_101-1  | 101  | 1 | a | 1.99 |
| MEL_102-1  | 102  | 1 | a | 2.31 |
| MEL_102-3  | 102  | 3 | a | 0.82 |
| MEL_102-4  | 102  | 4 | a | 0.51 |
| MEL_102-5  | 102  | 5 | a | 3.03 |
| MEL_103-1  | 103  | 1 | a | 2.31 |
| MEL_103-2  | 103  | 2 | a | 2.98 |
| MEL_103-3  | 103  | 3 | a | 0.39 |
| MEL_103-8  | 103  | 8 | a | 3.31 |
| MEL_104-2  | 104  | 2 | a | 0.38 |
| MEL_104-3  | 104  | 3 | a | 2.50 |
| MEL_104-4  | 104  | 4 | a | 2.77 |
| MEL_104-7  | 104  | 7 | a | 0.94 |
| MEL_105-1  | 105  | 1 | a | 1.65 |
| MEL_105-3  | 105  | 3 | a | 0.62 |
| MEL_105-5  | 105  | 5 | a | 0.67 |
| MEL_106a-1 | 106a | 1 | a | 2.00 |
| MEL_106b-1 | 106b | 1 | a | 0.99 |
| MEL_106b-2 | 106b | 2 | a | 0.33 |
| MEL_107-1a | 107  | 1 | a | 3.40 |
| MEL_107-3a | 107  | 3 | a | 2.20 |
| MEL_108-1  | 108  | 1 | a | 1.94 |
| MEL_108-2  | 108  | 2 | a | 1.47 |
| MEL_108-3  | 108  | 3 | a | 0.69 |
| MEL_108-4A | 108  | 4 | A | 1.95 |
| MEL_109-2  | 109  | 2 | a | 2.20 |
| MEL_109-6A | 109  | 6 | A | 2.09 |
| MEL_109-7A | 109  | 7 | A | 1.76 |
| MEL_111-1  | 111  | 1 | a | 0.52 |
| MEL_111-3  | 111  | 3 | a | 0.56 |
| MEL_111-7  | 111  | 7 | a | 2.78 |

---



|             |     |   |    |       |
|-------------|-----|---|----|-------|
| MEL_112-1a  | 112 | 1 | a  | 0.76  |
| MEL_112-4   | 112 | 4 | a  | 0.66  |
| MEL_112-5   | 112 | 5 | a  | 1.88  |
| MEL_113-1a  | 113 | 1 | a  | 1.13  |
| MEL_113-2   | 113 | 2 | a  | 1.01  |
| MEL_113-4   | 113 | 4 | a  | 1.31  |
| MEL_113-5   | 113 | 5 | a  | 0.44  |
| MEL_114-1   | 114 | 1 | a  | 2.00  |
| MEL_114-6   | 114 | 6 | a  | 1.13  |
| MEL_114-7   | 114 | 7 | a  | 1.97  |
| MEL_114-8   | 114 | 8 | a  | 1.59  |
| MEL_115-1   | 115 | 1 | a  | 2.92  |
| MEL_115-4   | 115 | 4 | a  | 0.46  |
| MEL_115-5   | 115 | 5 | a  | 0.78  |
| MEL_115-8   | 115 | 8 | a  | 2.18  |
| MEL_116-2   | 116 | 2 | a  | 0.22  |
| MEL_116-4A  | 116 | 4 | A  | 1.61  |
| MEL_116-6   | 116 | 6 | a  | 1.99  |
| MEL_116-7   | 116 | 7 | a  | 1.91  |
| MEL_117-2B  | 117 | 2 | B  | 1.49  |
| MEL_117-3B  | 117 | 3 | B  | 1.04  |
| MEL_117-5   | 117 | 5 | a  | 1.76  |
| MEL_118-1b  | 118 | 1 | b  | 1.49  |
| MEL_118-2aA | 118 | 2 | aA | 1.09  |
| MEL_118-3bA | 118 | 3 | bA | 1.59  |
| MEL_119-1   | 119 | 1 | a  | 1.59  |
| MEL_119-2   | 119 | 2 | a  | 1.66  |
| MEL_119-4   | 119 | 4 | a  | 1.29  |
| MEL_119-5   | 119 | 5 | a  | 2.69  |
| MEL_120-3   | 120 | 3 | a  | 1.60  |
| MEL_120-5   | 120 | 5 | a  | 2.83  |
| MEL_120-6   | 120 | 6 | a  | 1.83  |
| MEL_120-7   | 120 | 7 | a  | 3.26  |
| MEL_121-1b  | 121 | 1 | b  | 0.61  |
| MEL_121-1c  | 121 | 1 | c  | 2.60  |
| MEL_121-1d  | 121 | 1 | d  | 3.09  |
| MEL_121-1e  | 121 | 1 | e  | 2.70  |
| MEL_121-1f  | 121 | 1 | f  | 1.91  |
| MEL_122-1b  | 122 | 1 | b  | 2.81  |
| MEL_122-2b  | 122 | 2 | b  | 1.96  |
| MEL_122-4   | 122 | 4 | a  | 1.42  |
| MEL_123-1   | 123 | 1 | a  | 0.95  |
| MEL_123-2   | 123 | 2 | a  | 2.93  |
| MEL_123-4   | 123 | 4 | a  | 1.75  |
| MEL_124-2   | 124 | 2 | a  | 1.41  |
| MEL_124-4   | 124 | 4 | a  | 1.12  |
| MEL_124-5   | 124 | 5 | a  | 0.83  |
| MEL_124-7   | 124 | 7 | a  | 3.46  |
| MEL_125-1b  | 125 | 1 | b  | 1.20  |
| MEL_126-2   | 126 | 2 | a  | -0.07 |
| MEL_126-3   | 126 | 3 | a  | -0.03 |
| MEL_126-4   | 126 | 4 | a  | 1.44  |
| MEL_126-5   | 126 | 5 | a  | 2.31  |
| MEL_127-1b  | 127 | 1 | b  | 1.90  |
| MEL_127-2b  | 127 | 2 | b  | 1.31  |
| MEL_128-1   | 128 | 1 | a  | 2.01  |
| MEL_128-3   | 128 | 3 | a  | 0.60  |
| MEL_128-4   | 128 | 4 | a  | 1.61  |
| MEL_128-6   | 128 | 6 | a  | 1.98  |
| MEL_129-1   | 129 | 1 | a  | 0.51  |
| MEL_129-3   | 129 | 3 | a  | 0.97  |
| MEL_129-6   | 129 | 6 | a  | 1.59  |
| MEL_130-1   | 130 | 1 | a  | 1.58  |

---

|             |      |   |    |      |
|-------------|------|---|----|------|
| MEL_130-2   | 130  | 2 | a  | 1.21 |
| MEL_130-4   | 130  | 4 | a  | 1.57 |
| MEL_130-7A  | 130  | 7 | A  | 0.33 |
| MEL_131-1c  | 131  | 1 | c  | 1.98 |
| MEL_132-1   | 132  | 1 | a  | 1.55 |
| MEL_132-2   | 132  | 2 | a  | 1.44 |
| MEL_132-4   | 132  | 4 | a  | 1.85 |
| MEL_132-5   | 132  | 5 | a  | 1.72 |
| MEL_133-1B  | 133  | 1 | B  | 0.91 |
| MEL_133-2   | 133  | 2 | a  | 2.24 |
| MEL_133-4   | 133  | 4 | a  | 0.86 |
| MEL_133-7   | 133  | 7 | a  | 0.30 |
| MEL_134b-1a | 134b | 1 | a  | 0.35 |
| MEL_135-1c  | 135  | 1 | c  | 0.85 |
| MEL_136-1a  | 136  | 1 | a  | 1.01 |
| MEL_136-2a  | 136  | 2 | a  | 2.06 |
| MEL_136-3aB | 136  | 3 | aB | 1.56 |
| MEL_137a-1  | 137a | 1 | a  | 1.29 |
| MEL_137b-1  | 137b | 1 | a  | 1.83 |
| MEL_137b-3  | 137b | 3 | a  | 1.28 |
| MEL_138-1   | 138  | 1 | a  | 0.42 |
| MEL_138-4   | 138  | 4 | a  | 2.02 |
| MEL_139-1A  | 139  | 1 | A  | 0.54 |
| MEL_139-2   | 139  | 2 | a  | 2.73 |
| MEL_139-6   | 139  | 6 | a  | 1.69 |
| MEL_139-7   | 139  | 7 | a  | 1.49 |
| MEL_140-1b  | 140  | 1 | b  | 1.59 |
| MEL_140-2b  | 140  | 2 | b  | 1.65 |
| MEL_140-3   | 140  | 3 | a  | 0.49 |
| MEL_141-1   | 141  | 1 | a  | 0.45 |
| MEL_141-4   | 141  | 4 | a  | 1.22 |
| MEL_141-6   | 141  | 6 | a  | 1.82 |
| MEL_141-7   | 141  | 7 | a  | 0.59 |
| MEL_142-2   | 142  | 2 | a  | 0.65 |
| MEL_142-3   | 142  | 3 | a  | 2.15 |
| MEL_142-4   | 142  | 4 | a  | 1.24 |
| MEL_142-8   | 142  | 8 | a  | 0.76 |
| MEL_143-2   | 143  | 2 | a  | 1.70 |
| MEL_143-4   | 143  | 4 | a  | 1.84 |
| MEL_143-7   | 143  | 7 | a  | 1.98 |
| MEL_143-8   | 143  | 8 | a  | 0.84 |
| MEL_144-1a  | 144  | 1 | a  | 1.91 |
| MEL_145-2   | 145  | 2 | a  | 1.19 |
| MEL_145-3   | 145  | 3 | a  | 0.58 |
| MEL_145-4   | 145  | 4 | a  | 0.31 |
| MEL_145-6   | 145  | 6 | a  | 0.91 |
| MEL_146-1a  | 146  | 1 | a  | 0.89 |
| MEL_146-1b  | 146  | 1 | b  | 0.50 |
| MEL_147-1   | 147  | 1 | a  | 0.67 |
| MEL_147-5A  | 147  | 5 | A  | 0.65 |
| MEL_148-1a  | 148  | 1 | a  | 1.48 |
| MEL_148-1b  | 148  | 1 | b  | 1.60 |
| MEL_148-1cB | 148  | 1 | cB | 2.37 |
| MEL_148-1d  | 148  | 1 | d  | 1.88 |
| MEL_148-1e  | 148  | 1 | e  | 1.83 |
| MEL_148-1fA | 148  | 1 | fA | 2.70 |
| MEL_149-1   | 149  | 1 | a  | 1.52 |
| MEL_149-3   | 149  | 3 | a  | 0.66 |
| MEL_150-3   | 150  | 3 | a  | 1.35 |
| MEL_150-5   | 150  | 5 | a  | 1.69 |
| MEL_150-8   | 150  | 8 | a  | 1.85 |
| MEL_151-3   | 151  | 3 | a  | 1.58 |
| MEL_151-4   | 151  | 4 | a  | 1.13 |

---

|             |     |   |    |       |
|-------------|-----|---|----|-------|
| MEL_151-5   | 151 | 5 | a  | 0.17  |
| MEL_152-1a  | 152 | 1 | a  | 0.90  |
| MEL_152-2a  | 152 | 2 | a  | 1.99  |
| MEL_152-3B  | 152 | 3 | B  | 1.86  |
| MEL_152-4   | 152 | 4 | a  | 1.39  |
| MEL_153-1   | 153 | 1 | a  | 0.50  |
| MEL_154-1a  | 154 | 1 | a  | 3.17  |
| MEL_154-3   | 154 | 3 | a  | 0.31  |
| MEL_155-1a  | 155 | 1 | a  | 2.75  |
| MEL_155-2aA | 155 | 2 | aA | 2.07  |
| MEL_155-3a  | 155 | 3 | a  | 1.82  |
| MEL_156-1A  | 156 | 1 | A  | 2.01  |
| MEL_156-4   | 156 | 4 | a  | 2.06  |
| MEL_156-5   | 156 | 5 | a  | 2.00  |
| MEL_157-1   | 157 | 1 | a  | 1.85  |
| MEL_157-3   | 157 | 3 | a  | 1.92  |
| MEL_157-5   | 157 | 5 | a  | 0.11  |
| MEL_157-6   | 157 | 6 | a  | 2.17  |
| MEL_158-1A  | 158 | 1 | A  | 2.17  |
| MEL_158-2   | 158 | 2 | a  | 0.28  |
| MEL_158-4   | 158 | 4 | a  | 2.23  |
| MEL_158-7   | 158 | 7 | a  | 1.95  |
| MEL_158-8   | 158 | 8 | a  | 0.40  |
| MEL_159-2A  | 159 | 2 | A  | 1.86  |
| MEL_159-4   | 159 | 4 | a  | 2.26  |
| MEL_159-5   | 159 | 5 | a  | 0.42  |
| MEL_159-8   | 159 | 8 | a  | 0.71  |
| MEL_160-1   | 160 | 1 | a  | 1.41  |
| MEL_160-4   | 160 | 4 | a  | 0.48  |
| MEL_160-8   | 160 | 8 | a  | 2.00  |
| MEL_161-1   | 161 | 1 | a  | 1.77  |
| MEL_161-2   | 161 | 2 | a  | 2.94  |
| MEL_161-5   | 161 | 5 | a  | 1.68  |
| MEL_161-7   | 161 | 7 | a  | 2.72  |
| MEL_162-2   | 162 | 2 | a  | 2.02  |
| MEL_162-3   | 162 | 3 | a  | -0.12 |
| MEL_162-4A  | 162 | 4 | A  | 1.79  |
| MEL_162-6   | 162 | 6 | a  | 2.94  |
| MEL_163-2   | 163 | 2 | a  | 1.21  |
| MEL_163-3   | 163 | 3 | a  | 0.91  |
| MEL_163-4   | 163 | 4 | a  | 2.57  |
| MEL_163-7   | 163 | 7 | a  | 0.47  |
| MEL_164-2   | 164 | 2 | a  | 1.76  |
| MEL_164-4A  | 164 | 4 | A  | 2.07  |
| MEL_164-7   | 164 | 7 | a  | 0.44  |
| MEL_165-1A  | 165 | 1 | A  | 0.96  |
| MEL_165-2A  | 165 | 2 | A  | 2.77  |
| MEL_165-3   | 165 | 3 | a  | 1.77  |
| MEL_165-4   | 165 | 4 | a  | 1.25  |
| MEL_165-7   | 165 | 7 | a  | 2.34  |
| MEL_165-8   | 165 | 8 | a  | 0.52  |
| MEL_166-1a  | 166 | 1 | a  | 0.42  |
| MEL_166-2a  | 166 | 2 | a  | 1.03  |
| MEL_166-3b  | 166 | 3 | b  | 1.30  |
| MEL_167-7   | 167 | 7 | a  | 1.40  |
| MEL_168-1bA | 168 | 1 | bA | 1.02  |
| MEL_168-3   | 168 | 3 | a  | 1.54  |
| MEL_168-4   | 168 | 4 | a  | 2.07  |
| MEL_169-2aA | 169 | 2 | aA | 2.07  |
| MEL_169-2cA | 169 | 2 | cA | 1.34  |
| MEL_170-1b  | 170 | 1 | b  | -0.03 |
| MEL_170-3   | 170 | 3 | a  | 0.25  |
| MEL_170-5A  | 170 | 5 | A  | 2.64  |

|             |      |   |    |       |
|-------------|------|---|----|-------|
| MEL_170-8   | 170  | 8 | a  | 1.69  |
| MEL_171-2c  | 171  | 2 | c  | 1.64  |
| MEL_172-1   | 172  | 1 | a  | 2.07  |
| MEL_172-4A  | 172  | 4 | A  | 0.85  |
| MEL_172-5   | 172  | 5 | a  | 0.24  |
| MEL_172-6   | 172  | 6 | a  | 0.60  |
| MEL_173-2   | 173  | 2 | a  | 0.76  |
| MEL_173-5   | 173  | 5 | a  | 1.83  |
| MEL_174-1   | 174  | 1 | a  | 2.41  |
| MEL_174-2   | 174  | 2 | a  | 1.26  |
| MEL_174-3A  | 174  | 3 | A  | 1.23  |
| MEL_174-4   | 174  | 4 | a  | 1.28  |
| MEL_174-8B  | 174  | 8 | B  | 1.17  |
| MEL_175-2A  | 175  | 2 | A  | 1.52  |
| MEL_175-4B  | 175  | 4 | B  | 0.39  |
| MEL_175-5   | 175  | 5 | a  | 1.66  |
| MEL_175-6A  | 175  | 6 | A  | 1.99  |
| MEL_175-8   | 175  | 8 | a  | 2.00  |
| MEL_176-1   | 176  | 1 | a  | 2.17  |
| MEL_176-7   | 176  | 7 | a  | 0.45  |
| MEL_177a-1  | 177a | 1 | a  | 0.44  |
| MEL_177b-1a | 177b | 1 | a  | 2.58  |
| MEL_178-1b  | 178  | 1 | b  | 2.67  |
| MEL_178-2a  | 178  | 2 | a  | 1.14  |
| MEL_178-3a  | 178  | 3 | a  | 2.01  |
| MEL_179-2   | 179  | 2 | a  | 3.27  |
| MEL_179-3   | 179  | 3 | a  | 1.75  |
| MEL_179-5   | 179  | 5 | a  | 1.85  |
| MEL_180-1   | 180  | 1 | a  | 1.83  |
| MEL_180-2   | 180  | 2 | a  | 0.74  |
| MEL_180-5   | 180  | 5 | a  | 2.06  |
| MEL_180-6   | 180  | 6 | a  | 1.01  |
| MEL_181-1   | 181  | 1 | a  | 2.94  |
| MEL_181-3   | 181  | 3 | a  | -0.10 |
| MEL_181-5   | 181  | 5 | a  | 0.28  |
| MEL_181-7   | 181  | 7 | a  | 2.61  |
| MEL_182-1a  | 182  | 1 | a  | 2.26  |
| MEL_182-3b  | 182  | 3 | b  | 0.48  |
| MEL_182-4   | 182  | 4 | a  | 2.22  |
| MEL_183-1A  | 183  | 1 | A  | 0.54  |
| MEL_183-2B  | 183  | 2 | B  | 1.58  |
| MEL_183-7   | 183  | 7 | a  | 1.80  |
| MEL_184-1aB | 184  | 1 | aB | 2.35  |
| MEL_185-1   | 185  | 1 | a  | 1.98  |
| MEL_185-2   | 185  | 2 | a  | U     |
| MEL_185-3   | 185  | 3 | a  | 1.71  |
| MEL_185-5   | 185  | 5 | a  | 1.33  |
| MEL_186-2b  | 186  | 2 | b  | 0.92  |
| MEL_187-1b  | 187  | 1 | b  | 1.02  |
| MEL_187-3b  | 187  | 3 | b  | 2.31  |
| MEL_188-2   | 188  | 2 | a  | 1.91  |
| MEL_188-7   | 188  | 7 | a  | 2.79  |
| MEL_188-8B  | 188  | 8 | B  | 3.13  |
| MEL_189-2   | 189  | 2 | a  | 0.44  |
| MEL_189-3   | 189  | 3 | a  | 2.22  |
| MEL_189-5   | 189  | 5 | a  | 0.57  |
| MEL_189-7   | 189  | 7 | a  | 2.55  |
| MEL_190-2   | 190  | 2 | a  | 0.97  |
| MEL_190-4   | 190  | 4 | a  | 0.89  |
| MEL_190-7   | 190  | 7 | a  | 1.86  |
| MEL_190-8   | 190  | 8 | a  | 1.79  |
| MEL_191-1   | 191  | 1 | a  | 2.03  |
| MEL_191-2   | 191  | 2 | a  | 2.00  |

|             |      |   |    |      |
|-------------|------|---|----|------|
| MEL_191-3   | 191  | 3 | a  | 1.09 |
| MEL_191-4   | 191  | 4 | a  | 1.40 |
| MEL_191-6   | 191  | 6 | a  | 1.46 |
| MEL_192-1   | 192  | 1 | a  | 1.29 |
| MEL_192-4   | 192  | 4 | a  | 0.93 |
| MEL_192-6   | 192  | 6 | a  | 1.16 |
| MEL_192-7   | 192  | 7 | a  | 0.83 |
| MEL_193-1   | 193  | 1 | a  | 1.46 |
| MEL_193-2   | 193  | 2 | a  | 0.24 |
| MEL_193-6A  | 193  | 6 | A  | 1.05 |
| MEL_193-7B  | 193  | 7 | B  | 2.08 |
| MEL_193-8A  | 193  | 8 | A  | 1.63 |
| MEL_194a-4B | 194a | 4 | B  | 2.73 |
| MEL_194b-1  | 194b | 1 | a  | 1.02 |
| MEL_194b-4  | 194b | 4 | a  | 1.98 |
| MEL_195-1a  | 195  | 1 | a  | 0.59 |
| MEL_195-1cA | 195  | 1 | cA | 2.13 |
| MEL_195-1cD | 195  | 1 | cD | 0.32 |
| MEL_195-1d  | 195  | 1 | d  | 1.63 |
| MEL_195-1e  | 195  | 1 | e  | 1.01 |
| MEL_195-1f  | 195  | 1 | f  | 2.07 |
| MEL_196-1B  | 196  | 1 | B  | 0.64 |
| MEL_196-2   | 196  | 2 | a  | 2.68 |
| MEL_196-3   | 196  | 3 | a  | 0.78 |
| MEL_196-4   | 196  | 4 | a  | 2.35 |
| MEL_196-5   | 196  | 5 | a  | 1.88 |
| MEL_197-2   | 197  | 2 | a  | 1.30 |
| MEL_197-3   | 197  | 3 | a  | 0.65 |
| MEL_197-5   | 197  | 5 | a  | 1.69 |
| MEL_197-6   | 197  | 6 | a  | 0.52 |
| MEL_197-7   | 197  | 7 | a  | 1.11 |
| MEL_198-2   | 198  | 2 | a  | 2.85 |
| MEL_198-3   | 198  | 3 | a  | 1.33 |
| MEL_198-8   | 198  | 8 | a  | 0.55 |
| MEL_199-1   | 199  | 1 | a  | 3.10 |
| MEL_199-2   | 199  | 2 | a  | 3.49 |
| MEL_199-3   | 199  | 3 | a  | 1.25 |
| MEL_199-4   | 199  | 4 | a  | 0.80 |
| MEL_199-7   | 199  | 7 | a  | 2.82 |
| MEL_200-1b  | 200  | 1 | b  | 0.13 |
| MEL_200-3   | 200  | 3 | a  | 2.12 |
| MEL_200-5   | 200  | 5 | a  | 1.61 |
| MEL_201-1A  | 201  | 1 | A  | 0.65 |
| MEL_201-4   | 201  | 4 | a  | 1.42 |
| MEL_201-5   | 201  | 5 | a  | 0.24 |
| MEL_201-6   | 201  | 6 | a  | 0.43 |
| MEL_202-2   | 202  | 2 | a  | 0.47 |
| MEL_202-3   | 202  | 3 | a  | 0.33 |
| MEL_202-4   | 202  | 4 | a  | 0.47 |
| MEL_202-6   | 202  | 6 | a  | 1.63 |
| MEL_203-3   | 203  | 3 | a  | 1.63 |
| MEL_203-5   | 203  | 5 | a  | 0.83 |
| MEL_203-6   | 203  | 6 | a  | 1.67 |
| MEL_203-8   | 203  | 8 | a  | 2.02 |
| MEL_204-2   | 204  | 2 | a  | 1.42 |
| MEL_204-7A  | 204  | 7 | A  | 2.25 |
| MEL_205-1d  | 205  | 1 | d  | 1.96 |
| MEL_205-1eB | 205  | 1 | eB | 1.28 |
| MEL_205-1f  | 205  | 1 | f  | 2.02 |
| MEL_206a-1a | 206a | 1 | a  | 0.43 |
| MEL_206b-1  | 206b | 1 | a  | 1.46 |
| MEL_206b-2  | 206b | 2 | a  | 1.06 |
| MEL_207-3   | 207  | 3 | a  | 0.51 |

|            |     |    |    |      |
|------------|-----|----|----|------|
| MEL_207-6  | 207 | 6  | a  | 0.44 |
| MEL_207-7  | 207 | 7  | a  | 0.57 |
| MEL_208-1  | 208 | 1  | a  | 1.78 |
| MEL_208-2  | 208 | 2  | a  | 0.10 |
| MEL_208-3  | 208 | 3  | a  | 0.75 |
| MEL_208-4  | 208 | 4  | a  | 1.97 |
| MEL_208-6  | 208 | 6  | a  | 1.52 |
| MEL_209-1  | 209 | 1  | a  | 2.12 |
| MEL_209-2  | 209 | 2  | a  | 0.71 |
| MEL_209-4A | 209 | 4  | A  | 2.41 |
| MEL_209-5B | 209 | 5  | B  | 2.81 |
| MEL_209-6  | 209 | 6  | a  | 2.32 |
| MEL_210-1b | 210 | 1  | b  | 2.07 |
| MEL_210-2a | 210 | 2  | a  | 0.04 |
| MEL_210-4  | 210 | 4  | a  | 1.17 |
| Alchemy    | NA  | NA | NA | 0.38 |
| Brompton   | NA  | NA | NA | 1.33 |
| Claire     | NA  | NA | NA | 0.55 |
| Hereward   | NA  | NA | NA | 2.17 |
| Rialto     | NA  | NA | NA | 0.03 |
| Robigus    | NA  | NA | NA | 1.07 |
| Soissons   | NA  | NA | NA | 2.36 |
| Xi19       | NA  | NA | NA | 2    |

**Table S2 Genetic markers used for genetic mapping.** Chromosome and map position are indicated. NA = not applicable.

Available for download as an Excel file at [www.g3journal.org/lookup/suppl/doi:10.1534/g3.115.021584/-/DC1](http://www.g3journal.org/lookup/suppl/doi:10.1534/g3.115.021584/-/DC1)

**Table S3 Predicted rice genes within the physical region colinear with the wheat *Snn1* locus.** EP = expressed protein, HP = hypothetical protein, TE = transposable element. Rice genes in bold were identified as possessing wheat orthologues in the *Snn1* region, based either on orthology to a wheat SNP, or orthology to a gene on the same wheat GSS contig as the wheat SNP (see Table 1). The rice orthologues of the two peak *Snn1* marker are underlined.

| Rice gene model       | Annotation                                                     |
|-----------------------|----------------------------------------------------------------|
| LOC_Os05g00988        | HP                                                             |
| LOC_Os05g00990        | TE                                                             |
| LOC_Os05g00992        | EP                                                             |
| LOC_Os05g00994        | EP                                                             |
| LOC_Os05g00996        | TE                                                             |
| LOC_Os05g00998        | TE                                                             |
| LOC_Os05g01002        | TE                                                             |
| LOC_Os05g01006        | TE                                                             |
| LOC_Os05g01010        | EP                                                             |
| <b>LOC_Os05g01020</b> | <b>Transcriptional repressor, putative, expressed</b>          |
| <b>LOC_Os05g01030</b> | <b>phospholipid transporting ATP-ase</b>                       |
| <u>LOC_Os05g01040</u> | <u>serine/threonine protein kinase</u>                         |
| LOC_Os05g01050        | DNA binding protein                                            |
| <b>LOC_Os05g01060</b> | <b>EP</b>                                                      |
| LOC_Os05g01070        | EP                                                             |
| <b>LOC_Os05g01080</b> | <b>EP</b>                                                      |
| <u>LOC_Os05g01090</u> | <u>PEX14, putative</u>                                         |
| LOC_Os05g01100        | EP                                                             |
| <b>LOC_Os05g01110</b> | <b>Ribosomal protein LR28</b>                                  |
| LOC_Os05g01120        | Cytochrome P450                                                |
| LOC_Os05g01130        | TE                                                             |
| LOC_Os05g01140        | Methyltransferase                                              |
| LOC_Os05g01150        | TE                                                             |
| LOC_Os05g01160        | TE                                                             |
| LOC_Os05g01170        | TE                                                             |
| LOC_Os05g01180        | Zinc knuckle family protein                                    |
| LOC_Os05g01190        | TE                                                             |
| LOC_Os05g01200        | Exonuclease, putative                                          |
| LOC_Os05g01210        | EP                                                             |
| <b>LOC_Os05g01230</b> | <b>Zinc finger protein</b>                                     |
| <b>LOC_Os05g01240</b> | <b>AML1, putative</b>                                          |
| <b>LOC_Os05g01250</b> | <b>SNF7 domain protein</b>                                     |
| LOC_Os05g01256        | Helix-loop-helix DNA-binding protein, putative                 |
| LOC_Os05g01262        | Translocon-associated protein                                  |
| LOC_Os05g01270        | Peptidyl-prolyl cis-trans isomerase, putative                  |
| <b>LOC_Os05g01280</b> | <b>EP</b>                                                      |
| LOC_Os05g01290        | EP                                                             |
| LOC_Os05g01300        | EP                                                             |
| LOC_Os05g01320        | EP                                                             |
| LOC_Os05g01330        | EP                                                             |
| LOC_Os05g01350        | TE                                                             |
| LOC_Os05g01360        | EP                                                             |
| LOC_Os05g01370        | Polygalacturonase inhibitor precursor, putative                |
| LOC_Os05g01380        | Polygalacturonase inhibitor precursor, putative                |
| LOC_Os05g01390        | TE                                                             |
| LOC_Os05g01400        | TE                                                             |
| LOC_Os05g01410        | TE                                                             |
| LOC_Os05g01420        | TE                                                             |
| LOC_Os05g01430        | Polygalacturonase inhibitor precursor, putative                |
| LOC_Os05g01440        | Phosphoribosylformylglycinamide synthase, putative             |
| LOC_Os05g01444        | Polygalacturonase inhibitor precursor, putative                |
| LOC_Os05g01450        | Eukaryotic translation initiation factor 3 subunit F, putative |
| LOC_Os05g01460        | STIP1 homology and U box-containing protein 1, putative        |



---

|                       |                                                                     |
|-----------------------|---------------------------------------------------------------------|
| LOC_Os05g01470        | Methionine S-methyltransferase, putative                            |
| LOC_Os05g01480        | Ras-related protein, putative                                       |
| LOC_Os05g01490        | Ras-related protein, putative                                       |
| LOC_Os05g01500        | Tubulin-specific chaperone E, putative                              |
| LOC_Os05g01510        | Cytoplasmic membrane protein, putative                              |
| LOC_Os05g01520        | ECT protein, putative                                               |
| LOC_Os05g01530        | EP                                                                  |
| LOC_Os05g01540        | Serine/arginine repetitive matrix protein 1, putative               |
| <b>LOC_Os05g01550</b> | <b>ZOS5-01 - C2H2 zinc finger protein, expressed</b>                |
| LOC_Os05g01560        | Vacuolar ATP synthase, putative                                     |
| LOC_Os05g01570        | Auxin-induced protein 5NG4, putative                                |
| LOC_Os05g01580        | Integral membrane protein DUF6 containing protein, expressed        |
| LOC_Os05g01590        | Heat shock protein DnaJ, putative, expressed                        |
| LOC_Os05g01600        | Actin, putative, expressed                                          |
| LOC_Os05g01610        | FYVE zinc finger domain containing protein, expressed               |
| LOC_Os05g01620        | OsFBX155 - F-box domain containing protein, expressed               |
| LOC_Os05g01630        | OsFBX156 - F-box domain containing protein, expressed               |
| LOC_Os05g01635        | EP                                                                  |
| LOC_Os05g01640        | TE                                                                  |
| LOC_Os05g01650        | TE                                                                  |
| LOC_Os05g01660        | TE                                                                  |
| LOC_Os05g01670        | TE                                                                  |
| LOC_Os05g01675        | Photosystem I P700 chlorophyll a apoprotein A1, putative, expressed |
| LOC_Os05g01680        | RCLEA7 - Root cap and Late embryogenesis family protein precursor   |
| LOC_Os05g01690        | EP                                                                  |
| LOC_Os05g01700        | ABC transporter, ATP-binding protein, putative, expressed           |
| <b>LOC_Os05g01710</b> | <b>Transcription initiation factor IIA gamma chain, expressed</b>   |
| LOC_Os05g01730        | Drought induced 19 protein, putative, expressed                     |
| LOC_Os05g01750        | TruB family pseudouridylate synthase, putative, expressed           |
| LOC_Os05g01760        | Lysine ketoglutarate reductase trans-splicing related 1, putative   |
| LOC_Os05g01770        | TE                                                                  |
| <b>LOC_Os05g01780</b> | <b>STE kinase</b>                                                   |
| <b>LOC_Os05g01790</b> | <b>EP</b>                                                           |
| LOC_Os05g01810        | Xylem cysteine proteinase 2 precursor, putative, expressed          |
| LOC_Os05g01820        | Cytochrome b5-like Heme/Steroid binding domain containing protein   |
| LOC_Os05g01830        | EP                                                                  |
| LOC_Os05g01840        | HP                                                                  |
| LOC_Os05g01850        | TE                                                                  |
| LOC_Os05g01860        | EP                                                                  |
| LOC_Os05g01870        | HP                                                                  |
| LOC_Os05g01880        | EP                                                                  |
| LOC_Os05g01890        | EP                                                                  |
| LOC_Os05g01900        | EP                                                                  |
| LOC_Os05g01910        | Pumilio-family RNA binding protein, putative, expressed             |
| LOC_Os05g01920        | Inhibitor I family protein, putative, expressed                     |
| LOC_Os05g01940        | Zinc finger, RING-type, putative, expressed                         |
| LOC_Os05g01950        | EP                                                                  |
| LOC_Os05g01960        | EP                                                                  |
| LOC_Os05g01970        | NAD dependent epimerase/dehydratase family protein, putative        |
| LOC_Os05g01990        | DEAD-box ATP-dependent RNA helicase, putative, expressed            |
| LOC_Os05g01994        | Rab5-interacting protein like, putative, expressed                  |
| <b>LOC_Os05g02010</b> | <b>EP</b>                                                           |

---

**Table S4** Wheat lines used to validate the KASP marker for SNP Excalibur\_c21898\_1423. KASP genotype scores are indicated: homozygous A nucleotide (A:A), homozygous G nucleotide (G:G), heterozygous (A:G). U = missing data. Note, the KASP marker assays polymorphism on the opposite strand relative to the marker on the iSelect 90k array.

|    | <b>Wheat Accession</b> | <b>KASP genotype</b> |
|----|------------------------|----------------------|
| 1  | STORM                  | A:A                  |
| 2  | FIELDER                | A:A                  |
| 3  | JACADI                 | A:A                  |
| 4  | POSIT                  | A:A                  |
| 5  | SAREK                  | A:A                  |
| 6  | RENOWN                 | A:A                  |
| 7  | VERSAILLES             | A:A                  |
| 8  | TALON                  | A:A                  |
| 9  | JENA                   | A:A                  |
| 10 | FENDA                  | G:G                  |
| 11 | RIEBESEL               | A:A                  |
| 12 | EPOCH                  | A:A                  |
| 13 | GLASGOW                | A:A                  |
| 14 | WINDSOR                | A:A                  |
| 15 | HIGHBURY               | A:A                  |
| 16 | PANORAMA               | G:G                  |
| 17 | BATSMAN                | A:A                  |
| 18 | BRIGAND                | A:A                  |
| 19 | MADRIGAL               | A:A                  |
| 20 | EXSEPT                 | A:A                  |
| 21 | ORESTIS                | A:A                  |
| 22 | GOLDLACE               | A:A                  |
| 23 | PIRANHA                | A:A                  |
| 24 | SHIRAZ                 | A:A                  |
| 25 | BUZZER                 | G:G                  |
| 26 | LANGDALE               | A:A                  |
| 27 | TUXEDO                 | A:A                  |
| 28 | RITMO                  | A:A                  |
| 29 | COCOON                 | A:A                  |
| 30 | KRANICH                | A:A                  |
| 31 | COMET                  | A:A                  |
| 32 | CYBER                  | A:A                  |
| 33 | TIMARU                 | A:A                  |
| 34 | LIMERICK               | G:G                  |
| 35 | DW930861-509           | U                    |
| 36 | TELLUS                 | A:A                  |
| 37 | DEAN                   | A:A                  |
| 38 | AXONA                  | G:G                  |
| 39 | OBELISK                | A:A                  |
| 40 | CONTENDER              | A:A                  |
| 41 | A13-98                 | A:A                  |
| 42 | JERICO                 | A:A                  |
| 43 | CAPRIMUS               | A:A                  |
| 44 | MARSHAL                | A:A                  |
| 45 | CONVOY                 | G:G                  |
| 46 | MAVERICK               | A:A                  |
| 47 | TRAVIX                 | A:A                  |
| 48 | ECLIPSE                | A:A                  |
| 49 | ABELE                  | A:A                  |
| 50 | WICKHAM                | A:A                  |
| 51 | EXPLOSIV               | A:A                  |
| 52 | SANCERRE               | A:A                  |
| 53 | PROPHET                | A:A                  |
| 54 | RUBENS                 | A:A                  |
| 55 | STIGG                  | A:A                  |

|    |               |     |
|----|---------------|-----|
| 56 | ORTON         | A:A |
| 57 | KWS_PODIUM    | G:G |
| 58 | AARDEN        | A:A |
| 59 | EDMUNDS       | A:A |
| 60 | ISIDOR        | A:A |
| 61 | KWS_TARGET    | A:A |
| 62 | HURLEY        | A:A |
| 63 | HAYDOCK       | A:A |
| 64 | CARSTENS_VIII | A:A |
| 65 | KIPLING       | A:A |
| 66 | PASTICHE      | A:A |
| 67 | CANADAIR      | A:A |
| 68 | GALAHAD       | A:A |
| 69 | FLAIR         | A:A |
| 70 | VISCOUNT      | A:A |
| 71 | SANDOWN       | A:A |
| 72 | Longbow       | A:A |
| 73 | NEWMARKET     | A:A |
| 74 | FENMAN        | A:A |
| 75 | WELLINGTON    | A:A |
| 76 | PHLEBAS       | G:G |
| 77 | NEXUS         | A:A |
| 78 | MAXWELL       | A:A |
| 79 | KWS_BOHINEN   | G:G |
| 80 | HUDSON        | A:A |
| 81 | DENMAN        | A:A |
| 82 | CANTERBURY    | A:A |
| 83 | MANDATE       | A:A |
| 84 | ANVIL         | A:A |
| 85 | NSL_WW13      | A:A |
| 86 | TEMPLE        | A:A |
| 87 | FRELON        | A:A |
| 88 | BROILER       | A:A |
| 89 | AVOCET        | U   |
| 90 | HARDI         | A:A |
| 91 | LAZARUS       | A:A |
| 92 | TADEPI        | A:A |
| 93 | SITKA         | A:A |
| 94 | OCHRE         | A:A |
| 95 | HAMMER        | A:A |

---

**Table S5 Parental genotypic calls for significant genetic markers that co-segregate with the peak marker, Excalibur\_c21898\_1423.** Genotype calls with the lowest frequency in the eight founders are highlighted in grey. Kukri\_c37738\_417, the second most highly correlated of the twelve additional manually scored markers, is also included.

| No. | SNP                   | Chr. | cM    | $-\log_{10}P$ | Alchemy | Brompton | Claire | Hereward | Rialto | Robigus | Soissons | Xi19 |
|-----|-----------------------|------|-------|---------------|---------|----------|--------|----------|--------|---------|----------|------|
| 1   | Excalibur_c21898_1423 | 1B   | 8.361 | 55.29         | 2       | 2        | 2      | 2        | 2      | 2       | 0        | 0    |
| 2   | BS00093078_51         | 1B   | 8.361 | 54.12         | 0       | 0        | 0      | 0        | 0      | 0       | 2        | 2    |
| 3   | BS00026180_51a        | 1B   | 8.361 | 51.61         | 0       | 0        | 0      | 0        | 0      | 0       | 2        | 2    |
| 4   | Jagger_c5878_119      | 1B   | 8.361 | 24.19         | 0       | 2        | 0      | 0        | 2      | 0       | 2        | 2    |
| 5   | Kukri_c44369_131      | 1B   | 8.361 | 24.04         | 2       | 2        | 0      | 0        | 2      | 0       | 2        | 2    |
| 6   | BS00071333_51         | 1B   | 8.361 | 24.02         | 0       | 2        | 0      | 0        | 2      | 0       | 2        | 2    |
| 7   | BS00022504_51         | 1B   | 8.361 | 23.73         | 2       | 2        | 0      | 0        | 2      | 0       | 2        | 2    |
| 8   | RAC875_c24163_155     | 1B   | 8.361 | 23.32         | 2       | 2        | 0      | 0        | 2      | 0       | 2        | 2    |
| 9   | Excalibur_c10657_796  | 1B   | 8.361 | 8.70          | 0       | 0        | 0      | 0        | 0      | 0       | 2        | 0    |
| 10  | BS00050522_51         | 1B   | 8.361 | 8.11          | 2       | 2        | 0      | 2        | 2      | 2       | 2        | 0    |
| 11  | Kukri_c37738_417      | 1B   | 9.679 | 38.44         | 0       | 0        | 0      | 0        | 0      | 0       | 0        | 2    |

## File S1

### Supporting Text

The recent consensus map (Wang *et al.* 2014) contains some map position anomalies. Four significant SNPs appeared to be located at chromosomal positions that indicated a possible mapping error. Two of these markers were located on chromosome 1B, but ~20 cM distal to *Snn1* (Excalibur\_c22958\_433, 60.624 cM. BS00022180\_51, 64.099 cM). The third was located on chromosome 1A (BS00067961\_51, 38.111 cM), while a fourth was located on 1D (BobWhite\_c4303\_524). Genetic map positions for these three SNPs were investigated in the MAGIC population by identifying their most highly correlated markers using the Pearson Correlation Coefficient. Where the correlation coefficient was <0.99,  $D'$  was used to estimate map position. These analyses indicated the most likely map positions for three of these SNPs were as follows: Excalibur\_c22958\_433: 8.361 cM (based on a correlation of 0.99 with SNP Kukri\_c44369\_131). BS00022180\_51: 43.858 cM (based on a correlation of 0.99 with BS00071161\_51). BobWhite\_c4303\_524: 1B, 9.679 cM (based on correlation of 0.998 with Kukri\_c37738\_417). The positions of these SNPs in QTL analyses have been amended accordingly. SNP BS00067961\_51 showed a correlation of 0.83 with Excalibur\_c16851\_835 (chr 1B, 31.040 cM). However, further analysis found it to be associated ( $D' = 1$ ) with clusters of markers both on chromosome 1B (eg IAAV4194, 1B 31.094 cM) and 1A. Due to the ambiguous nature of the genetic map position of this marker, we treat it here as unmapped.
