# Supplementary material for: Fine-Mapping the Wheat Snn1 Locus Conferring Sensitivity to the Parastagonospora nodorum Necrotrophic Effector SnTox1 Using an Eight Founder Multiparent Advanced Generation Inter-Cross Population
Source: PubMed Central journal article supplement (PMC4632045; doi:10.1534/g3.115.021584), 2015-09-24
Supplement: supp_g3.115.021584_FigureS1.pdf [file supp_g3.115.021584_FigureS1.pdf]

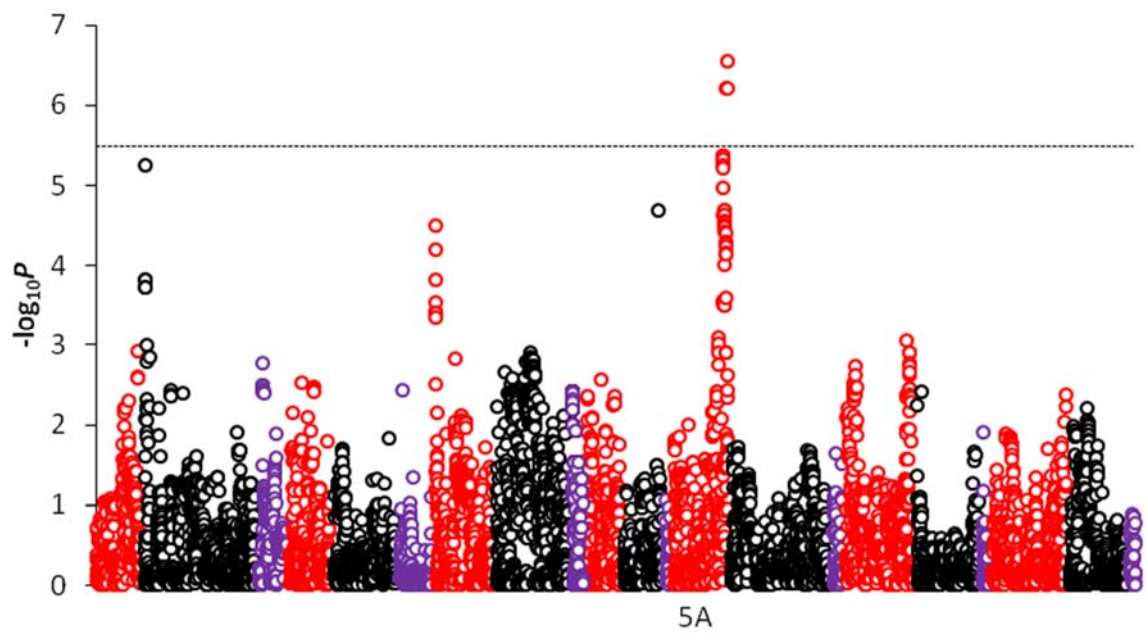

**Figure S1** QTL analysis for SnTox1 sensitivity, after inclusion of the peak 1B marker 'Excalibur\_c21898\_1423' as a covariate. SNPs mapping to the 21 wheat chromosomes are indicated in red (A genome), black (B genome) and purple (D genome). The Bonferroni corrected  $P = 0.05$  significance threshold is indicated (dashed line). Unmapped markers are not shown.
