# Supplementary material for: Fine-Mapping the Wheat Snn1 Locus Conferring Sensitivity to the Parastagonospora nodorum Necrotrophic Effector SnTox1 Using an Eight Founder Multiparent Advanced Generation Inter-Cross Population
Source: PubMed Central journal article supplement (PMC4632045; doi:10.1534/g3.115.021584), 2015-09-24
Supplement: supp_g3.115.021584_FigureS2.pdf [file supp_g3.115.021584_FigureS2.pdf]

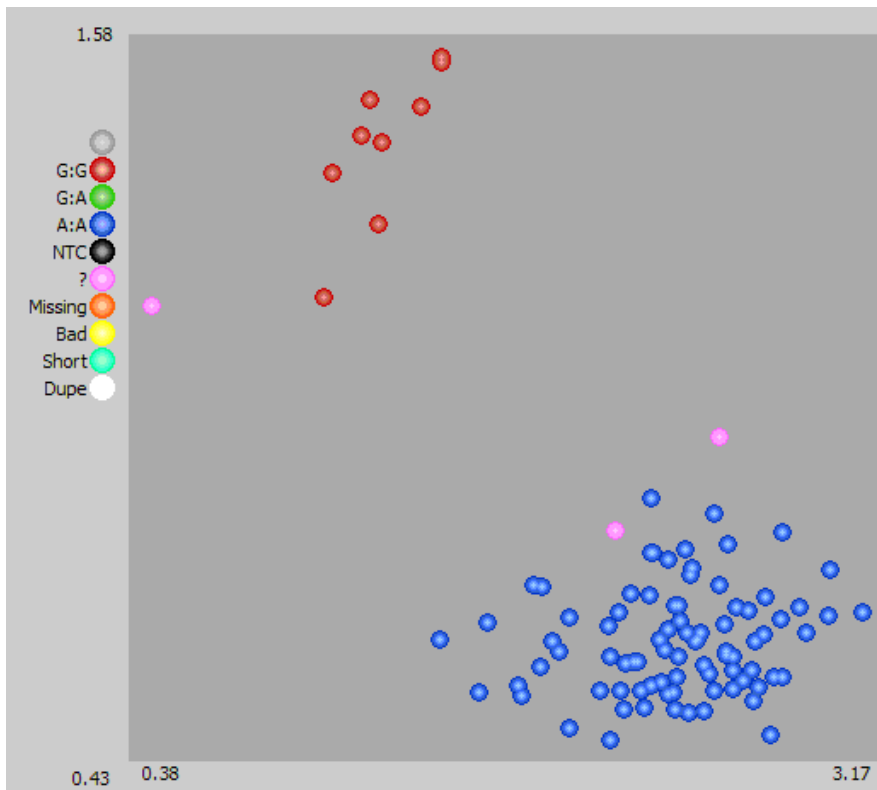

**Figure S2** Conversion of SNP BS00093078\_51 to the KASP genotyping platform. The assay was validated using a panel of 96 wheat varieties listed in Supplementary Table 3. Note, the KASP marker assays polymorphism on the opposite strand relative to the marker on the iSelect 90k array.
