# Supplementary material for: Fine-Mapping the Wheat Snn1 Locus Conferring Sensitivity to the Parastagonospora nodorum Necrotrophic Effector SnTox1 Using an Eight Founder Multiparent Advanced Generation Inter-Cross Population
Source: PubMed Central journal article supplement (PMC4632045; doi:10.1534/g3.115.021584), 2015-09-24
Supplement: supp_g3.115.021584_TableS1.pdf [file supp_g3.115.021584_TableS1.pdf]

**Table S1** MAGIC lines screened for SnTox1 sensitivity. Adjusted phenotypic means listed.

| Variety     | Funnel | Plant | Line | Mean Tox1 score |
|-------------|--------|-------|------|-----------------|
| MEL_001-1b  | 1      | 1     | b    | 0.64            |
| MEL_001-2b  | 1      | 2     | b    | 2.68            |
| MEL_002-1   | 2      | 1     | a    | 0.78            |
| MEL_002-3   | 2      | 3     | a    | 2.35            |
| MEL_002-5-A | 2      | 5     | a    | 1.88            |
| MEL_002-7-B | 2      | 7     | a    | 1.30            |
| MEL_002-8   | 2      | 8     | a    | 0.65            |
| MEL_003-1c  | 3      | 1     | c    | 1.69            |
| MEL_004-1   | 4      | 1     | a    | 0.52            |
| MEL_004-2   | 4      | 2     | a    | 1.11            |
| MEL_004-3   | 4      | 3     | a    | 2.85            |
| MEL_004-5   | 4      | 5     | a    | 1.33            |
| MEL_005-3   | 5      | 3     | a    | 0.55            |
| MEL_005-5   | 5      | 5     | a    | 3.10            |
| MEL_005-7   | 5      | 7     | a    | 3.49            |
| MEL_005-8-A | 5      | 8     | a    | 1.25            |
| MEL_006-1   | 6      | 1     | a    | 0.80            |
| MEL_006-3   | 6      | 3     | a    | 2.82            |
| MEL_006-6   | 6      | 6     | a    | 0.13            |
| MEL_006-7   | 6      | 7     | a    | 2.12            |
| MEL_006-8   | 6      | 8     | a    | 1.61            |
| MEL_007-1b  | 7      | 1     | b    | 0.65            |
| MEL_007-2b  | 7      | 2     | b    | 1.42            |
| MEL_008-2   | 8      | 2     | a    | 0.24            |
| MEL_008-3   | 8      | 3     | a    | 0.43            |
| MEL_008-4   | 8      | 4     | a    | 0.47            |
| MEL_009b-2  | 009b   | 2     | a    | 0.33            |
| MEL_010-1aA | 10     | 1     | aA   | 0.47            |
| MEL_010-1b  | 10     | 1     | b    | 1.63            |
| MEL_010-3   | 10     | 3     | a    | 1.63            |
| MEL_010-5   | 10     | 5     | a    | 0.83            |
| MEL_011-1b  | 11     | 1     | b    | 1.67            |
| MEL_011-2a  | 11     | 2     | a    | 2.02            |
| MEL_011-3   | 11     | 3     | a    | 1.42            |
| MEL_012-1b  | 12     | 1     | b    | 2.25            |
| MEL_012-2b  | 12     | 2     | b    | 1.96            |
| MEL_012-3   | 12     | 3     | a    | 1.28            |
| MEL_012-4   | 12     | 4     | a    | 2.02            |
| MEL_013-1a  | 13     | 1     | a    | 0.43            |
| MEL_013-2c  | 13     | 2     | c    | 1.46            |
| MEL_014-2   | 14     | 2     | a    | 1.06            |
| MEL_014-4   | 14     | 4     | a    | 0.51            |
| MEL_014-7   | 14     | 7     | a    | 0.44            |
| MEL_014-8   | 14     | 8     | a    | 0.57            |
| MEL_015-2   | 15     | 2     | a    | 1.78            |
| MEL_015-3   | 15     | 3     | a    | 0.10            |
| MEL_015-7   | 15     | 7     | a    | 0.75            |
| MEL_016-1   | 16     | 1     | a    | 1.97            |
| MEL_016-4   | 16     | 4     | a    | 1.52            |
| MEL_016-6   | 16     | 6     | a    | 2.12            |
| MEL_016-7   | 16     | 7     | a    | 0.71            |
| MEL_017-4   | 17     | 4     | a    | 2.41            |
| MEL_017-6   | 17     | 6     | a    | 2.81            |
| MEL_017-7   | 17     | 7     | a    | 2.32            |
| MEL_018-1   | 18     | 1     | a    | 2.07            |
| MEL_018-2   | 18     | 2     | a    | 0.04            |
| MEL_019-1a  | 19     | 1     | a    | 1.17            |
| MEL_019-4   | 19     | 4     | a    | 0.76            |
| MEL_019-5   | 19     | 5     | a    | 1.24            |
| MEL_019-6-A | 19     | 6     | a    | 0.81            |

|              |    |   |   |       |
|--------------|----|---|---|-------|
| MEL_020-1-A  | 20 | 1 | a | 2.61  |
| MEL_020-3    | 20 | 3 | a | 2.19  |
| MEL_020-5    | 20 | 5 | a | 1.66  |
| MEL_020-7    | 20 | 7 | a | 1.36  |
| MEL_021-1    | 21 | 1 | a | 0.88  |
| MEL_021-2    | 21 | 2 | a | 0.34  |
| MEL_021-3    | 21 | 3 | a | 0.25  |
| MEL_021-7    | 21 | 7 | a | 1.39  |
| MEL_022-1c   | 22 | 1 | c | 2.13  |
| MEL_022-2b   | 22 | 2 | b | 0.87  |
| MEL_023-2    | 23 | 2 | a | 2.56  |
| MEL_023-4    | 23 | 4 | a | 4.00  |
| MEL_023-5    | 23 | 5 | a | 1.50  |
| MEL_023-6    | 23 | 6 | a | 0.84  |
| MEL_024-2    | 24 | 2 | a | 2.17  |
| MEL_025-1a-A | 25 | 1 | a | 1.96  |
| MEL_025-1b   | 25 | 1 | b | 1.01  |
| MEL_025-1c-A | 25 | 1 | c | 2.29  |
| MEL_025-1d   | 25 | 1 | d | 1.92  |
| MEL_025-1e   | 25 | 1 | e | 0.66  |
| MEL_025-1f   | 25 | 1 | f | 1.29  |
| MEL_026-1b   | 26 | 1 | b | 2.57  |
| MEL_027-1e   | 27 | 1 | e | 2.04  |
| MEL_028-1c   | 28 | 1 | c | 2.66  |
| MEL_029-1c   | 29 | 1 | c | 1.61  |
| MEL_029-2b   | 29 | 2 | b | 0.03  |
| MEL_030-1b   | 30 | 1 | b | 0.73  |
| MEL_030-2a   | 30 | 2 | a | 1.95  |
| MEL_031-1c   | 31 | 1 | c | 2.62  |
| MEL_031-2c   | 31 | 2 | c | 1.95  |
| MEL_032-1    | 32 | 1 | a | 0.66  |
| MEL_032-2    | 32 | 2 | a | 2.17  |
| MEL_032-5    | 32 | 5 | a | 2.58  |
| MEL_032-6    | 32 | 6 | a | -0.34 |
| MEL_032-8    | 32 | 8 | a | 1.95  |
| MEL_033-1-A  | 33 | 1 | a | 1.07  |
| MEL_033-2    | 33 | 2 | a | 0.51  |
| MEL_033-4    | 33 | 4 | a | 2.06  |
| MEL_033-5    | 33 | 5 | a | 2.03  |
| MEL_033-7    | 33 | 7 | a | 2.44  |
| MEL_034-4    | 34 | 4 | a | 2.14  |
| MEL_034-5    | 34 | 5 | a | 0.15  |
| MEL_034-6    | 34 | 6 | a | 0.65  |
| MEL_034-7    | 34 | 7 | a | 0.70  |
| MEL_035-1    | 35 | 1 | a | 2.46  |
| MEL_035-2    | 35 | 2 | a | 0.76  |
| MEL_035-3    | 35 | 3 | a | 0.81  |
| MEL_035-7    | 35 | 7 | a | 2.42  |
| MEL_035-8    | 35 | 8 | a | 1.95  |
| MEL_036-1b   | 36 | 1 | b | 0.87  |
| MEL_036-3    | 36 | 3 | a | 3.20  |
| MEL_036-8    | 36 | 8 | a | 0.67  |
| MEL_037-1a   | 37 | 1 | a | 2.93  |
| MEL_037-2a   | 37 | 2 | a | 1.50  |
| MEL_038-1a   | 38 | 1 | a | 1.86  |
| MEL_038-2b   | 38 | 2 | b | -0.12 |
| MEL_039-1e   | 39 | 1 | e | 1.44  |
| MEL_040-1c   | 40 | 1 | c | 2.17  |
| MEL_040-2c   | 40 | 2 | c | 2.30  |
| MEL_041-1c   | 41 | 1 | c | 2.41  |
| MEL_041-2c   | 41 | 2 | c | 1.07  |
| MEL_042-1b   | 42 | 1 | b | 1.77  |
| MEL_043-1    | 43 | 1 | a | 3.21  |

|             |      |   |    |      |
|-------------|------|---|----|------|
| MEL_043-2   | 43   | 2 | a  | 1.93 |
| MEL_043-3   | 43   | 3 | a  | 2.18 |
| MEL_043-5   | 43   | 5 | a  | 1.23 |
| MEL_043-6   | 43   | 6 | a  | 2.65 |
| MEL_043-7   | 43   | 7 | a  | 1.52 |
| MEL_044a-1  | 044a | 1 | a  | 1.25 |
| MEL_044a-2  | 044a | 2 | a  | 1.96 |
| MEL_044a-4  | 044a | 4 | a  | 3.08 |
| MEL_044b-1b | 044b | 1 | b  | 2.02 |
| MEL_045-1b  | 45   | 1 | b  | 0.64 |
| MEL_046-1   | 46   | 1 | a  | 0.78 |
| MEL_046-2   | 46   | 2 | a  | 1.60 |
| MEL_046-7   | 46   | 7 | a  | 1.39 |
| MEL_047a-1  | 047a | 1 | a  | 0.38 |
| MEL_047a-3  | 047a | 3 | a  | 1.37 |
| MEL_047b-1a | 047b | 1 | a  | 1.55 |
| MEL_048-1a  | 48   | 1 | a  | 0.97 |
| MEL_048-1c  | 48   | 1 | c  | 1.32 |
| MEL_049-2   | 49   | 2 | a  | 0.61 |
| MEL_049-5   | 49   | 5 | a  | U    |
| MEL_050-1   | 50   | 1 | a  | 0.55 |
| MEL_050-5   | 50   | 5 | a  | 1.35 |
| MEL_050-6   | 50   | 6 | a  | 1.09 |
| MEL_051-1d  | 51   | 1 | d  | 1.92 |
| MEL_052-1   | 52   | 1 | a  | 1.22 |
| MEL_052-3   | 52   | 3 | a  | 0.61 |
| MEL_052-5   | 52   | 5 | a  | 0.56 |
| MEL_052-7-A | 52   | 7 | a  | 0.92 |
| MEL_052-8-A | 52   | 8 | a  | 1.62 |
| MEL_053-1aA | 53   | 1 | aA | 0.08 |
| MEL_053-2aB | 53   | 2 | aB | 2.52 |
| MEL_053-3   | 53   | 3 | a  | 1.03 |
| MEL_054-1A  | 54   | 1 | A  | 1.06 |
| MEL_054-2   | 54   | 2 | a  | 1.86 |
| MEL_054-3A  | 54   | 3 | A  | 1.32 |
| MEL_054-7   | 54   | 7 | a  | 0.83 |
| MEL_054-8   | 54   | 8 | a  | 2.09 |
| MEL_055-1aA | 55   | 1 | aA | 1.50 |
| MEL_055-2b  | 55   | 2 | b  | 2.03 |
| MEL_056-1   | 56   | 1 | a  | 2.82 |
| MEL_056-4   | 56   | 4 | a  | 2.03 |
| MEL_056-5   | 56   | 5 | a  | 0.99 |
| MEL_056-6   | 56   | 6 | a  | 2.40 |
| MEL_057-1a  | 57   | 1 | a  | 1.41 |
| MEL_057-3   | 57   | 3 | a  | 0.01 |
| MEL_058-1   | 58   | 1 | a  | 1.08 |
| MEL_058-2   | 58   | 2 | a  | 1.54 |
| MEL_058-4   | 58   | 4 | a  | 1.95 |
| MEL_059-1a  | 59   | 1 | a  | 0.95 |
| MEL_059-1b  | 59   | 1 | b  | 0.86 |
| MEL_059-1c  | 59   | 1 | c  | 1.52 |
| MEL_059-1d  | 59   | 1 | d  | 2.03 |
| MEL_059-1e  | 59   | 1 | e  | 1.97 |
| MEL_059-1f  | 59   | 1 | f  | 2.06 |
| MEL_060-1a  | 60   | 1 | a  | 1.37 |
| MEL_060-1b  | 60   | 1 | b  | 0.63 |
| MEL_060-2bA | 60   | 2 | b  | 2.83 |
| MEL_060-3   | 60   | 3 | a  | 0.47 |
| MEL_060-4   | 60   | 4 | a  | 1.94 |
| MEL_061-1   | 61   | 1 | a  | 0.79 |
| MEL_061-2   | 61   | 2 | a  | 0.37 |
| MEL_061-4A  | 61   | 4 | A  | 0.22 |
| MEL_061-7   | 61   | 7 | a  | 1.45 |

|             |      |   |    |       |
|-------------|------|---|----|-------|
| MEL_062-1a  | 62   | 1 | a  | 2.33  |
| MEL_062-2   | 62   | 2 | a  | 0.26  |
| MEL_062-3   | 62   | 3 | a  | 0.52  |
| MEL_063a-2  | 063a | 2 | a  | 0.54  |
| MEL_063b-1  | 063b | 1 | a  | 1.67  |
| MEL_064-1a  | 64   | 1 | a  | 1.10  |
| MEL_064-1c  | 64   | 1 | c  | 1.22  |
| MEL_064-1d  | 64   | 1 | d  | 0.10  |
| MEL_064-1e  | 64   | 1 | e  | 2.32  |
| MEL_064-1f  | 64   | 1 | f  | 0.62  |
| MEL_065-1c  | 65   | 1 | c  | 1.52  |
| MEL_065-2b  | 65   | 2 | b  | 1.78  |
| MEL_070-1c  | 70   | 1 | c  | 2.21  |
| MEL_071-1a  | 71   | 1 | a  | 2.50  |
| MEL_071-1b  | 71   | 1 | b  | 0.20  |
| MEL_071-1c  | 71   | 1 | c  | 1.04  |
| MEL_071-1e  | 71   | 1 | e  | 1.98  |
| MEL_071-1f  | 71   | 1 | f  | 0.43  |
| MEL_072-1a  | 72   | 1 | a  | 1.32  |
| MEL_072-1b  | 72   | 1 | b  | 3.04  |
| MEL_072-1c  | 72   | 1 | c  | 2.43  |
| MEL_072-1d  | 72   | 1 | d  | 2.10  |
| MEL_072-1e  | 72   | 1 | e  | 0.40  |
| MEL_072-1f  | 72   | 1 | f  | 2.60  |
| MEL_073-3A  | 73   | 3 | A  | 2.14  |
| MEL_073-6   | 73   | 6 | a  | 1.78  |
| MEL_073-8   | 73   | 8 | a  | 2.55  |
| MEL_074-3   | 74   | 3 | a  | 2.12  |
| MEL_074-5   | 74   | 5 | a  | 1.32  |
| MEL_075-1b  | 75   | 1 | b  | 1.37  |
| MEL_075-2b  | 75   | 2 | b  | 1.51  |
| MEL_075-3   | 75   | 3 | a  | -0.01 |
| MEL_075-4   | 75   | 4 | a  | 2.17  |
| MEL_076-1d  | 76   | 1 | d  | 0.97  |
| MEL_077-4   | 77   | 4 | a  | 1.22  |
| MEL_078-1cA | 78   | 1 | cA | 1.38  |
| MEL_081-1a  | 81   | 1 | a  | 0.85  |
| MEL_081-3   | 81   | 3 | a  | 1.44  |
| MEL_081-4   | 81   | 4 | a  | 2.25  |
| MEL_081-5   | 81   | 5 | a  | 0.92  |
| MEL_082-1aA | 82   | 1 | aA | 1.39  |
| MEL_082-1b  | 82   | 1 | b  | 1.70  |
| MEL_082-2   | 82   | 2 | a  | 2.61  |
| MEL_083-1   | 83   | 1 | a  | 1.12  |
| MEL_084-7   | 84   | 7 | a  | 0.27  |
| MEL_085-2b  | 85   | 2 | b  | 1.75  |
| MEL_085-4   | 85   | 4 | a  | 2.32  |
| MEL_086-3   | 86   | 3 | a  | 1.13  |
| MEL_086-7   | 86   | 7 | a  | 2.46  |
| MEL_087-1c  | 87   | 1 | c  | 1.97  |
| MEL_088-1   | 88   | 1 | a  | 2.11  |
| MEL_088-3   | 88   | 3 | a  | 2.50  |
| MEL_088-7   | 88   | 7 | a  | 0.47  |
| MEL_089-1a  | 89   | 1 | a  | 1.48  |
| MEL_089-2a  | 89   | 2 | a  | 1.50  |
| MEL_089-4   | 89   | 4 | a  | 1.99  |
| MEL_090-1a  | 90   | 1 | a  | 1.98  |
| MEL_090-2c  | 90   | 2 | c  | 1.11  |
| MEL_091-2   | 91   | 2 | a  | 2.50  |
| MEL_091-3   | 91   | 3 | a  | 3.38  |
| MEL_091-4   | 91   | 4 | a  | 0.76  |
| MEL_091-5   | 91   | 5 | a  | 1.39  |
| MEL_092-1   | 92   | 1 | a  | 1.99  |

---

|            |      |   |   |      |
|------------|------|---|---|------|
| MEL_092-3  | 92   | 3 | a | 0.01 |
| MEL_092-4  | 92   | 4 | a | 2.66 |
| MEL_092-6  | 92   | 6 | a | 0.49 |
| MEL_093-2  | 93   | 2 | a | 1.47 |
| MEL_093-3  | 93   | 3 | a | 1.88 |
| MEL_093-4  | 93   | 4 | a | 1.67 |
| MEL_093-6  | 93   | 6 | a | 1.32 |
| MEL_093-7  | 93   | 7 | a | 0.79 |
| MEL_094-1c | 94   | 1 | c | 0.79 |
| MEL_095-1  | 95   | 1 | a | 1.49 |
| MEL_095-2  | 95   | 2 | a | 0.37 |
| MEL_095-6  | 95   | 6 | a | 2.51 |
| MEL_095-7A | 95   | 7 | A | 1.97 |
| MEL_095-8B | 95   | 8 | B | 1.78 |
| MEL_096-1a | 96   | 1 | a | 0.81 |
| MEL_096-2  | 96   | 2 | a | 1.98 |
| MEL_096-4  | 96   | 4 | a | 1.95 |
| MEL_096-5  | 96   | 5 | a | 0.38 |
| MEL_096-6  | 96   | 6 | a | 1.13 |
| MEL_097-1  | 97   | 1 | a | 1.60 |
| MEL_097-2A | 97   | 2 | A | 1.81 |
| MEL_097-3A | 97   | 3 | A | 1.29 |
| MEL_097-5  | 97   | 5 | a | 2.25 |
| MEL_097-6  | 97   | 6 | a | 1.83 |
| MEL_098-1  | 98   | 1 | a | 2.67 |
| MEL_098-2  | 98   | 2 | a | 1.74 |
| MEL_098-5B | 98   | 5 | B | 0.68 |
| MEL_099-2  | 99   | 2 | a | 2.19 |
| MEL_099-5  | 99   | 5 | a | 1.39 |
| MEL_099-8  | 99   | 8 | a | U    |
| MEL_100-1b | 100  | 1 | b | 0.74 |
| MEL_100-2b | 100  | 2 | b | 1.58 |
| MEL_101-1  | 101  | 1 | a | 1.99 |
| MEL_102-1  | 102  | 1 | a | 2.31 |
| MEL_102-3  | 102  | 3 | a | 0.82 |
| MEL_102-4  | 102  | 4 | a | 0.51 |
| MEL_102-5  | 102  | 5 | a | 3.03 |
| MEL_103-1  | 103  | 1 | a | 2.31 |
| MEL_103-2  | 103  | 2 | a | 2.98 |
| MEL_103-3  | 103  | 3 | a | 0.39 |
| MEL_103-8  | 103  | 8 | a | 3.31 |
| MEL_104-2  | 104  | 2 | a | 0.38 |
| MEL_104-3  | 104  | 3 | a | 2.50 |
| MEL_104-4  | 104  | 4 | a | 2.77 |
| MEL_104-7  | 104  | 7 | a | 0.94 |
| MEL_105-1  | 105  | 1 | a | 1.65 |
| MEL_105-3  | 105  | 3 | a | 0.62 |
| MEL_105-5  | 105  | 5 | a | 0.67 |
| MEL_106a-1 | 106a | 1 | a | 2.00 |
| MEL_106b-1 | 106b | 1 | a | 0.99 |
| MEL_106b-2 | 106b | 2 | a | 0.33 |
| MEL_107-1a | 107  | 1 | a | 3.40 |
| MEL_107-3a | 107  | 3 | a | 2.20 |
| MEL_108-1  | 108  | 1 | a | 1.94 |
| MEL_108-2  | 108  | 2 | a | 1.47 |
| MEL_108-3  | 108  | 3 | a | 0.69 |
| MEL_108-4A | 108  | 4 | A | 1.95 |
| MEL_109-2  | 109  | 2 | a | 2.20 |
| MEL_109-6A | 109  | 6 | A | 2.09 |
| MEL_109-7A | 109  | 7 | A | 1.76 |
| MEL_111-1  | 111  | 1 | a | 0.52 |
| MEL_111-3  | 111  | 3 | a | 0.56 |
| MEL_111-7  | 111  | 7 | a | 2.78 |

---

---

|             |     |   |    |       |
|-------------|-----|---|----|-------|
| MEL_112-1a  | 112 | 1 | a  | 0.76  |
| MEL_112-4   | 112 | 4 | a  | 0.66  |
| MEL_112-5   | 112 | 5 | a  | 1.88  |
| MEL_113-1a  | 113 | 1 | a  | 1.13  |
| MEL_113-2   | 113 | 2 | a  | 1.01  |
| MEL_113-4   | 113 | 4 | a  | 1.31  |
| MEL_113-5   | 113 | 5 | a  | 0.44  |
| MEL_114-1   | 114 | 1 | a  | 2.00  |
| MEL_114-6   | 114 | 6 | a  | 1.13  |
| MEL_114-7   | 114 | 7 | a  | 1.97  |
| MEL_114-8   | 114 | 8 | a  | 1.59  |
| MEL_115-1   | 115 | 1 | a  | 2.92  |
| MEL_115-4   | 115 | 4 | a  | 0.46  |
| MEL_115-5   | 115 | 5 | a  | 0.78  |
| MEL_115-8   | 115 | 8 | a  | 2.18  |
| MEL_116-2   | 116 | 2 | a  | 0.22  |
| MEL_116-4A  | 116 | 4 | A  | 1.61  |
| MEL_116-6   | 116 | 6 | a  | 1.99  |
| MEL_116-7   | 116 | 7 | a  | 1.91  |
| MEL_117-2B  | 117 | 2 | B  | 1.49  |
| MEL_117-3B  | 117 | 3 | B  | 1.04  |
| MEL_117-5   | 117 | 5 | a  | 1.76  |
| MEL_118-1b  | 118 | 1 | b  | 1.49  |
| MEL_118-2aA | 118 | 2 | aA | 1.09  |
| MEL_118-3bA | 118 | 3 | bA | 1.59  |
| MEL_119-1   | 119 | 1 | a  | 1.59  |
| MEL_119-2   | 119 | 2 | a  | 1.66  |
| MEL_119-4   | 119 | 4 | a  | 1.29  |
| MEL_119-5   | 119 | 5 | a  | 2.69  |
| MEL_120-3   | 120 | 3 | a  | 1.60  |
| MEL_120-5   | 120 | 5 | a  | 2.83  |
| MEL_120-6   | 120 | 6 | a  | 1.83  |
| MEL_120-7   | 120 | 7 | a  | 3.26  |
| MEL_121-1b  | 121 | 1 | b  | 0.61  |
| MEL_121-1c  | 121 | 1 | c  | 2.60  |
| MEL_121-1d  | 121 | 1 | d  | 3.09  |
| MEL_121-1e  | 121 | 1 | e  | 2.70  |
| MEL_121-1f  | 121 | 1 | f  | 1.91  |
| MEL_122-1b  | 122 | 1 | b  | 2.81  |
| MEL_122-2b  | 122 | 2 | b  | 1.96  |
| MEL_122-4   | 122 | 4 | a  | 1.42  |
| MEL_123-1   | 123 | 1 | a  | 0.95  |
| MEL_123-2   | 123 | 2 | a  | 2.93  |
| MEL_123-4   | 123 | 4 | a  | 1.75  |
| MEL_124-2   | 124 | 2 | a  | 1.41  |
| MEL_124-4   | 124 | 4 | a  | 1.12  |
| MEL_124-5   | 124 | 5 | a  | 0.83  |
| MEL_124-7   | 124 | 7 | a  | 3.46  |
| MEL_125-1b  | 125 | 1 | b  | 1.20  |
| MEL_126-2   | 126 | 2 | a  | -0.07 |
| MEL_126-3   | 126 | 3 | a  | -0.03 |
| MEL_126-4   | 126 | 4 | a  | 1.44  |
| MEL_126-5   | 126 | 5 | a  | 2.31  |
| MEL_127-1b  | 127 | 1 | b  | 1.90  |
| MEL_127-2b  | 127 | 2 | b  | 1.31  |
| MEL_128-1   | 128 | 1 | a  | 2.01  |
| MEL_128-3   | 128 | 3 | a  | 0.60  |
| MEL_128-4   | 128 | 4 | a  | 1.61  |
| MEL_128-6   | 128 | 6 | a  | 1.98  |
| MEL_129-1   | 129 | 1 | a  | 0.51  |
| MEL_129-3   | 129 | 3 | a  | 0.97  |
| MEL_129-6   | 129 | 6 | a  | 1.59  |
| MEL_130-1   | 130 | 1 | a  | 1.58  |

---

|             |      |   |    |      |
|-------------|------|---|----|------|
| MEL_130-2   | 130  | 2 | a  | 1.21 |
| MEL_130-4   | 130  | 4 | a  | 1.57 |
| MEL_130-7A  | 130  | 7 | A  | 0.33 |
| MEL_131-1c  | 131  | 1 | c  | 1.98 |
| MEL_132-1   | 132  | 1 | a  | 1.55 |
| MEL_132-2   | 132  | 2 | a  | 1.44 |
| MEL_132-4   | 132  | 4 | a  | 1.85 |
| MEL_132-5   | 132  | 5 | a  | 1.72 |
| MEL_133-1B  | 133  | 1 | B  | 0.91 |
| MEL_133-2   | 133  | 2 | a  | 2.24 |
| MEL_133-4   | 133  | 4 | a  | 0.86 |
| MEL_133-7   | 133  | 7 | a  | 0.30 |
| MEL_134b-1a | 134b | 1 | a  | 0.35 |
| MEL_135-1c  | 135  | 1 | c  | 0.85 |
| MEL_136-1a  | 136  | 1 | a  | 1.01 |
| MEL_136-2a  | 136  | 2 | a  | 2.06 |
| MEL_136-3aB | 136  | 3 | aB | 1.56 |
| MEL_137a-1  | 137a | 1 | a  | 1.29 |
| MEL_137b-1  | 137b | 1 | a  | 1.83 |
| MEL_137b-3  | 137b | 3 | a  | 1.28 |
| MEL_138-1   | 138  | 1 | a  | 0.42 |
| MEL_138-4   | 138  | 4 | a  | 2.02 |
| MEL_139-1A  | 139  | 1 | A  | 0.54 |
| MEL_139-2   | 139  | 2 | a  | 2.73 |
| MEL_139-6   | 139  | 6 | a  | 1.69 |
| MEL_139-7   | 139  | 7 | a  | 1.49 |
| MEL_140-1b  | 140  | 1 | b  | 1.59 |
| MEL_140-2b  | 140  | 2 | b  | 1.65 |
| MEL_140-3   | 140  | 3 | a  | 0.49 |
| MEL_141-1   | 141  | 1 | a  | 0.45 |
| MEL_141-4   | 141  | 4 | a  | 1.22 |
| MEL_141-6   | 141  | 6 | a  | 1.82 |
| MEL_141-7   | 141  | 7 | a  | 0.59 |
| MEL_142-2   | 142  | 2 | a  | 0.65 |
| MEL_142-3   | 142  | 3 | a  | 2.15 |
| MEL_142-4   | 142  | 4 | a  | 1.24 |
| MEL_142-8   | 142  | 8 | a  | 0.76 |
| MEL_143-2   | 143  | 2 | a  | 1.70 |
| MEL_143-4   | 143  | 4 | a  | 1.84 |
| MEL_143-7   | 143  | 7 | a  | 1.98 |
| MEL_143-8   | 143  | 8 | a  | 0.84 |
| MEL_144-1a  | 144  | 1 | a  | 1.91 |
| MEL_145-2   | 145  | 2 | a  | 1.19 |
| MEL_145-3   | 145  | 3 | a  | 0.58 |
| MEL_145-4   | 145  | 4 | a  | 0.31 |
| MEL_145-6   | 145  | 6 | a  | 0.91 |
| MEL_146-1a  | 146  | 1 | a  | 0.89 |
| MEL_146-1b  | 146  | 1 | b  | 0.50 |
| MEL_147-1   | 147  | 1 | a  | 0.67 |
| MEL_147-5A  | 147  | 5 | A  | 0.65 |
| MEL_148-1a  | 148  | 1 | a  | 1.48 |
| MEL_148-1b  | 148  | 1 | b  | 1.60 |
| MEL_148-1cB | 148  | 1 | cB | 2.37 |
| MEL_148-1d  | 148  | 1 | d  | 1.88 |
| MEL_148-1e  | 148  | 1 | e  | 1.83 |
| MEL_148-1fA | 148  | 1 | fA | 2.70 |
| MEL_149-1   | 149  | 1 | a  | 1.52 |
| MEL_149-3   | 149  | 3 | a  | 0.66 |
| MEL_150-3   | 150  | 3 | a  | 1.35 |
| MEL_150-5   | 150  | 5 | a  | 1.69 |
| MEL_150-8   | 150  | 8 | a  | 1.85 |
| MEL_151-3   | 151  | 3 | a  | 1.58 |
| MEL_151-4   | 151  | 4 | a  | 1.13 |

|             |     |   |    |       |
|-------------|-----|---|----|-------|
| MEL_151-5   | 151 | 5 | a  | 0.17  |
| MEL_152-1a  | 152 | 1 | a  | 0.90  |
| MEL_152-2a  | 152 | 2 | a  | 1.99  |
| MEL_152-3B  | 152 | 3 | B  | 1.86  |
| MEL_152-4   | 152 | 4 | a  | 1.39  |
| MEL_153-1   | 153 | 1 | a  | 0.50  |
| MEL_154-1a  | 154 | 1 | a  | 3.17  |
| MEL_154-3   | 154 | 3 | a  | 0.31  |
| MEL_155-1a  | 155 | 1 | a  | 2.75  |
| MEL_155-2aA | 155 | 2 | aA | 2.07  |
| MEL_155-3a  | 155 | 3 | a  | 1.82  |
| MEL_156-1A  | 156 | 1 | A  | 2.01  |
| MEL_156-4   | 156 | 4 | a  | 2.06  |
| MEL_156-5   | 156 | 5 | a  | 2.00  |
| MEL_157-1   | 157 | 1 | a  | 1.85  |
| MEL_157-3   | 157 | 3 | a  | 1.92  |
| MEL_157-5   | 157 | 5 | a  | 0.11  |
| MEL_157-6   | 157 | 6 | a  | 2.17  |
| MEL_158-1A  | 158 | 1 | A  | 2.17  |
| MEL_158-2   | 158 | 2 | a  | 0.28  |
| MEL_158-4   | 158 | 4 | a  | 2.23  |
| MEL_158-7   | 158 | 7 | a  | 1.95  |
| MEL_158-8   | 158 | 8 | a  | 0.40  |
| MEL_159-2A  | 159 | 2 | A  | 1.86  |
| MEL_159-4   | 159 | 4 | a  | 2.26  |
| MEL_159-5   | 159 | 5 | a  | 0.42  |
| MEL_159-8   | 159 | 8 | a  | 0.71  |
| MEL_160-1   | 160 | 1 | a  | 1.41  |
| MEL_160-4   | 160 | 4 | a  | 0.48  |
| MEL_160-8   | 160 | 8 | a  | 2.00  |
| MEL_161-1   | 161 | 1 | a  | 1.77  |
| MEL_161-2   | 161 | 2 | a  | 2.94  |
| MEL_161-5   | 161 | 5 | a  | 1.68  |
| MEL_161-7   | 161 | 7 | a  | 2.72  |
| MEL_162-2   | 162 | 2 | a  | 2.02  |
| MEL_162-3   | 162 | 3 | a  | -0.12 |
| MEL_162-4A  | 162 | 4 | A  | 1.79  |
| MEL_162-6   | 162 | 6 | a  | 2.94  |
| MEL_163-2   | 163 | 2 | a  | 1.21  |
| MEL_163-3   | 163 | 3 | a  | 0.91  |
| MEL_163-4   | 163 | 4 | a  | 2.57  |
| MEL_163-7   | 163 | 7 | a  | 0.47  |
| MEL_164-2   | 164 | 2 | a  | 1.76  |
| MEL_164-4A  | 164 | 4 | A  | 2.07  |
| MEL_164-7   | 164 | 7 | a  | 0.44  |
| MEL_165-1A  | 165 | 1 | A  | 0.96  |
| MEL_165-2A  | 165 | 2 | A  | 2.77  |
| MEL_165-3   | 165 | 3 | a  | 1.77  |
| MEL_165-4   | 165 | 4 | a  | 1.25  |
| MEL_165-7   | 165 | 7 | a  | 2.34  |
| MEL_165-8   | 165 | 8 | a  | 0.52  |
| MEL_166-1a  | 166 | 1 | a  | 0.42  |
| MEL_166-2a  | 166 | 2 | a  | 1.03  |
| MEL_166-3b  | 166 | 3 | b  | 1.30  |
| MEL_167-7   | 167 | 7 | a  | 1.40  |
| MEL_168-1bA | 168 | 1 | bA | 1.02  |
| MEL_168-3   | 168 | 3 | a  | 1.54  |
| MEL_168-4   | 168 | 4 | a  | 2.07  |
| MEL_169-2aA | 169 | 2 | aA | 2.07  |
| MEL_169-2cA | 169 | 2 | cA | 1.34  |
| MEL_170-1b  | 170 | 1 | b  | -0.03 |
| MEL_170-3   | 170 | 3 | a  | 0.25  |
| MEL_170-5A  | 170 | 5 | A  | 2.64  |



|             |      |   |    |       |
|-------------|------|---|----|-------|
| MEL_170-8   | 170  | 8 | a  | 1.69  |
| MEL_171-2c  | 171  | 2 | c  | 1.64  |
| MEL_172-1   | 172  | 1 | a  | 2.07  |
| MEL_172-4A  | 172  | 4 | A  | 0.85  |
| MEL_172-5   | 172  | 5 | a  | 0.24  |
| MEL_172-6   | 172  | 6 | a  | 0.60  |
| MEL_173-2   | 173  | 2 | a  | 0.76  |
| MEL_173-5   | 173  | 5 | a  | 1.83  |
| MEL_174-1   | 174  | 1 | a  | 2.41  |
| MEL_174-2   | 174  | 2 | a  | 1.26  |
| MEL_174-3A  | 174  | 3 | A  | 1.23  |
| MEL_174-4   | 174  | 4 | a  | 1.28  |
| MEL_174-8B  | 174  | 8 | B  | 1.17  |
| MEL_175-2A  | 175  | 2 | A  | 1.52  |
| MEL_175-4B  | 175  | 4 | B  | 0.39  |
| MEL_175-5   | 175  | 5 | a  | 1.66  |
| MEL_175-6A  | 175  | 6 | A  | 1.99  |
| MEL_175-8   | 175  | 8 | a  | 2.00  |
| MEL_176-1   | 176  | 1 | a  | 2.17  |
| MEL_176-7   | 176  | 7 | a  | 0.45  |
| MEL_177a-1  | 177a | 1 | a  | 0.44  |
| MEL_177b-1a | 177b | 1 | a  | 2.58  |
| MEL_178-1b  | 178  | 1 | b  | 2.67  |
| MEL_178-2a  | 178  | 2 | a  | 1.14  |
| MEL_178-3a  | 178  | 3 | a  | 2.01  |
| MEL_179-2   | 179  | 2 | a  | 3.27  |
| MEL_179-3   | 179  | 3 | a  | 1.75  |
| MEL_179-5   | 179  | 5 | a  | 1.85  |
| MEL_180-1   | 180  | 1 | a  | 1.83  |
| MEL_180-2   | 180  | 2 | a  | 0.74  |
| MEL_180-5   | 180  | 5 | a  | 2.06  |
| MEL_180-6   | 180  | 6 | a  | 1.01  |
| MEL_181-1   | 181  | 1 | a  | 2.94  |
| MEL_181-3   | 181  | 3 | a  | -0.10 |
| MEL_181-5   | 181  | 5 | a  | 0.28  |
| MEL_181-7   | 181  | 7 | a  | 2.61  |
| MEL_182-1a  | 182  | 1 | a  | 2.26  |
| MEL_182-3b  | 182  | 3 | b  | 0.48  |
| MEL_182-4   | 182  | 4 | a  | 2.22  |
| MEL_183-1A  | 183  | 1 | A  | 0.54  |
| MEL_183-2B  | 183  | 2 | B  | 1.58  |
| MEL_183-7   | 183  | 7 | a  | 1.80  |
| MEL_184-1aB | 184  | 1 | aB | 2.35  |
| MEL_185-1   | 185  | 1 | a  | 1.98  |
| MEL_185-2   | 185  | 2 | a  | U     |
| MEL_185-3   | 185  | 3 | a  | 1.71  |
| MEL_185-5   | 185  | 5 | a  | 1.33  |
| MEL_186-2b  | 186  | 2 | b  | 0.92  |
| MEL_187-1b  | 187  | 1 | b  | 1.02  |
| MEL_187-3b  | 187  | 3 | b  | 2.31  |
| MEL_188-2   | 188  | 2 | a  | 1.91  |
| MEL_188-7   | 188  | 7 | a  | 2.79  |
| MEL_188-8B  | 188  | 8 | B  | 3.13  |
| MEL_189-2   | 189  | 2 | a  | 0.44  |
| MEL_189-3   | 189  | 3 | a  | 2.22  |
| MEL_189-5   | 189  | 5 | a  | 0.57  |
| MEL_189-7   | 189  | 7 | a  | 2.55  |
| MEL_190-2   | 190  | 2 | a  | 0.97  |
| MEL_190-4   | 190  | 4 | a  | 0.89  |
| MEL_190-7   | 190  | 7 | a  | 1.86  |
| MEL_190-8   | 190  | 8 | a  | 1.79  |
| MEL_191-1   | 191  | 1 | a  | 2.03  |
| MEL_191-2   | 191  | 2 | a  | 2.00  |

|             |      |   |    |      |
|-------------|------|---|----|------|
| MEL_191-3   | 191  | 3 | a  | 1.09 |
| MEL_191-4   | 191  | 4 | a  | 1.40 |
| MEL_191-6   | 191  | 6 | a  | 1.46 |
| MEL_192-1   | 192  | 1 | a  | 1.29 |
| MEL_192-4   | 192  | 4 | a  | 0.93 |
| MEL_192-6   | 192  | 6 | a  | 1.16 |
| MEL_192-7   | 192  | 7 | a  | 0.83 |
| MEL_193-1   | 193  | 1 | a  | 1.46 |
| MEL_193-2   | 193  | 2 | a  | 0.24 |
| MEL_193-6A  | 193  | 6 | A  | 1.05 |
| MEL_193-7B  | 193  | 7 | B  | 2.08 |
| MEL_193-8A  | 193  | 8 | A  | 1.63 |
| MEL_194a-4B | 194a | 4 | B  | 2.73 |
| MEL_194b-1  | 194b | 1 | a  | 1.02 |
| MEL_194b-4  | 194b | 4 | a  | 1.98 |
| MEL_195-1a  | 195  | 1 | a  | 0.59 |
| MEL_195-1cA | 195  | 1 | cA | 2.13 |
| MEL_195-1cD | 195  | 1 | cD | 0.32 |
| MEL_195-1d  | 195  | 1 | d  | 1.63 |
| MEL_195-1e  | 195  | 1 | e  | 1.01 |
| MEL_195-1f  | 195  | 1 | f  | 2.07 |
| MEL_196-1B  | 196  | 1 | B  | 0.64 |
| MEL_196-2   | 196  | 2 | a  | 2.68 |
| MEL_196-3   | 196  | 3 | a  | 0.78 |
| MEL_196-4   | 196  | 4 | a  | 2.35 |
| MEL_196-5   | 196  | 5 | a  | 1.88 |
| MEL_197-2   | 197  | 2 | a  | 1.30 |
| MEL_197-3   | 197  | 3 | a  | 0.65 |
| MEL_197-5   | 197  | 5 | a  | 1.69 |
| MEL_197-6   | 197  | 6 | a  | 0.52 |
| MEL_197-7   | 197  | 7 | a  | 1.11 |
| MEL_198-2   | 198  | 2 | a  | 2.85 |
| MEL_198-3   | 198  | 3 | a  | 1.33 |
| MEL_198-8   | 198  | 8 | a  | 0.55 |
| MEL_199-1   | 199  | 1 | a  | 3.10 |
| MEL_199-2   | 199  | 2 | a  | 3.49 |
| MEL_199-3   | 199  | 3 | a  | 1.25 |
| MEL_199-4   | 199  | 4 | a  | 0.80 |
| MEL_199-7   | 199  | 7 | a  | 2.82 |
| MEL_200-1b  | 200  | 1 | b  | 0.13 |
| MEL_200-3   | 200  | 3 | a  | 2.12 |
| MEL_200-5   | 200  | 5 | a  | 1.61 |
| MEL_201-1A  | 201  | 1 | A  | 0.65 |
| MEL_201-4   | 201  | 4 | a  | 1.42 |
| MEL_201-5   | 201  | 5 | a  | 0.24 |
| MEL_201-6   | 201  | 6 | a  | 0.43 |
| MEL_202-2   | 202  | 2 | a  | 0.47 |
| MEL_202-3   | 202  | 3 | a  | 0.33 |
| MEL_202-4   | 202  | 4 | a  | 0.47 |
| MEL_202-6   | 202  | 6 | a  | 1.63 |
| MEL_203-3   | 203  | 3 | a  | 1.63 |
| MEL_203-5   | 203  | 5 | a  | 0.83 |
| MEL_203-6   | 203  | 6 | a  | 1.67 |
| MEL_203-8   | 203  | 8 | a  | 2.02 |
| MEL_204-2   | 204  | 2 | a  | 1.42 |
| MEL_204-7A  | 204  | 7 | A  | 2.25 |
| MEL_205-1d  | 205  | 1 | d  | 1.96 |
| MEL_205-1eB | 205  | 1 | eB | 1.28 |
| MEL_205-1f  | 205  | 1 | f  | 2.02 |
| MEL_206a-1a | 206a | 1 | a  | 0.43 |
| MEL_206b-1  | 206b | 1 | a  | 1.46 |
| MEL_206b-2  | 206b | 2 | a  | 1.06 |
| MEL_207-3   | 207  | 3 | a  | 0.51 |

|            |     |    |    |      |
|------------|-----|----|----|------|
| MEL_207-6  | 207 | 6  | a  | 0.44 |
| MEL_207-7  | 207 | 7  | a  | 0.57 |
| MEL_208-1  | 208 | 1  | a  | 1.78 |
| MEL_208-2  | 208 | 2  | a  | 0.10 |
| MEL_208-3  | 208 | 3  | a  | 0.75 |
| MEL_208-4  | 208 | 4  | a  | 1.97 |
| MEL_208-6  | 208 | 6  | a  | 1.52 |
| MEL_209-1  | 209 | 1  | a  | 2.12 |
| MEL_209-2  | 209 | 2  | a  | 0.71 |
| MEL_209-4A | 209 | 4  | A  | 2.41 |
| MEL_209-5B | 209 | 5  | B  | 2.81 |
| MEL_209-6  | 209 | 6  | a  | 2.32 |
| MEL_210-1b | 210 | 1  | b  | 2.07 |
| MEL_210-2a | 210 | 2  | a  | 0.04 |
| MEL_210-4  | 210 | 4  | a  | 1.17 |
| Alchemy    | NA  | NA | NA | 0.38 |
| Brompton   | NA  | NA | NA | 1.33 |
| Claire     | NA  | NA | NA | 0.55 |
| Hereward   | NA  | NA | NA | 2.17 |
| Rialto     | NA  | NA | NA | 0.03 |
| Robigus    | NA  | NA | NA | 1.07 |
| Soissons   | NA  | NA | NA | 2.36 |
| Xi19       | NA  | NA | NA | 2    |
