# Supplementary material for: Fine-Mapping the Wheat Snn1 Locus Conferring Sensitivity to the Parastagonospora nodorum Necrotrophic Effector SnTox1 Using an Eight Founder Multiparent Advanced Generation Inter-Cross Population
Source: PubMed Central journal article supplement (PMC4632045; doi:10.1534/g3.115.021584), 2015-09-24
Supplement: supp_g3.115.021584_TableS3.pdf [file supp_g3.115.021584_TableS3.pdf]

**Table S3 Predicted rice genes within the physical region colinear with the wheat *Snn1* locus.** EP = expressed protein, HP = hypothetical protein, TE = transposable element. Rice genes in bold were identified as possessing wheat orthologues in the *Snn1* region, based either on orthology to a wheat SNP, or orthology to a gene on the same wheat GSS contig as the wheat SNP (see Table 1). The rice orthologues of the two peak *Snn1* marker are underlined.

| Rice gene model       | Annotation                                                     |
|-----------------------|----------------------------------------------------------------|
| LOC_Os05g00988        | HP                                                             |
| LOC_Os05g00990        | TE                                                             |
| LOC_Os05g00992        | EP                                                             |
| LOC_Os05g00994        | EP                                                             |
| LOC_Os05g00996        | TE                                                             |
| LOC_Os05g00998        | TE                                                             |
| LOC_Os05g01002        | TE                                                             |
| LOC_Os05g01006        | TE                                                             |
| LOC_Os05g01010        | EP                                                             |
| <b>LOC_Os05g01020</b> | <b>Transcriptional repressor, putative, expressed</b>          |
| <b>LOC_Os05g01030</b> | <b>phospholipid transporting ATP-ase</b>                       |
| <u>LOC_Os05g01040</u> | <u>serine/threonine protein kinase</u>                         |
| LOC_Os05g01050        | DNA binding protein                                            |
| <b>LOC_Os05g01060</b> | <b>EP</b>                                                      |
| LOC_Os05g01070        | EP                                                             |
| <b>LOC_Os05g01080</b> | <b>EP</b>                                                      |
| <u>LOC_Os05g01090</u> | <u>PEX14, putative</u>                                         |
| LOC_Os05g01100        | EP                                                             |
| <b>LOC_Os05g01110</b> | <b>Ribosomal protein LR28</b>                                  |
| LOC_Os05g01120        | Cytochrome P450                                                |
| LOC_Os05g01130        | TE                                                             |
| LOC_Os05g01140        | Methyltransferase                                              |
| LOC_Os05g01150        | TE                                                             |
| LOC_Os05g01160        | TE                                                             |
| LOC_Os05g01170        | TE                                                             |
| LOC_Os05g01180        | Zinc knuckle family protein                                    |
| LOC_Os05g01190        | TE                                                             |
| LOC_Os05g01200        | Exonuclease, putative                                          |
| LOC_Os05g01210        | EP                                                             |
| <b>LOC_Os05g01230</b> | <b>Zinc finger protein</b>                                     |
| <b>LOC_Os05g01240</b> | <b>AML1, putative</b>                                          |
| <b>LOC_Os05g01250</b> | <b>SNF7 domain protein</b>                                     |
| LOC_Os05g01256        | Helix-loop-helix DNA-binding protein, putative                 |
| LOC_Os05g01262        | Translocon-associated protein                                  |
| LOC_Os05g01270        | Peptidyl-prolyl cis-trans isomerase, putative                  |
| <b>LOC_Os05g01280</b> | <b>EP</b>                                                      |
| LOC_Os05g01290        | EP                                                             |
| LOC_Os05g01300        | EP                                                             |
| LOC_Os05g01320        | EP                                                             |
| LOC_Os05g01330        | EP                                                             |
| LOC_Os05g01350        | TE                                                             |
| LOC_Os05g01360        | EP                                                             |
| LOC_Os05g01370        | Polygalacturonase inhibitor precursor, putative                |
| LOC_Os05g01380        | Polygalacturonase inhibitor precursor, putative                |
| LOC_Os05g01390        | TE                                                             |
| LOC_Os05g01400        | TE                                                             |
| LOC_Os05g01410        | TE                                                             |
| LOC_Os05g01420        | TE                                                             |
| LOC_Os05g01430        | Polygalacturonase inhibitor precursor, putative                |
| LOC_Os05g01440        | Phosphoribosylformylglycinamide synthase, putative             |
| LOC_Os05g01444        | Polygalacturonase inhibitor precursor, putative                |
| LOC_Os05g01450        | Eukaryotic translation initiation factor 3 subunit F, putative |
| LOC_Os05g01460        | STIP1 homology and U box-containing protein 1, putative        |

---

|                       |                                                                     |
|-----------------------|---------------------------------------------------------------------|
| LOC_Os05g01470        | Methionine S-methyltransferase, putative                            |
| LOC_Os05g01480        | Ras-related protein, putative                                       |
| LOC_Os05g01490        | Ras-related protein, putative                                       |
| LOC_Os05g01500        | Tubulin-specific chaperone E, putative                              |
| LOC_Os05g01510        | Cytoplasmic membrane protein, putative                              |
| LOC_Os05g01520        | ECT protein, putative                                               |
| LOC_Os05g01530        | EP                                                                  |
| LOC_Os05g01540        | Serine/arginine repetitive matrix protein 1, putative               |
| <b>LOC_Os05g01550</b> | <b>ZOS5-01 - C2H2 zinc finger protein, expressed</b>                |
| LOC_Os05g01560        | Vacuolar ATP synthase, putative                                     |
| LOC_Os05g01570        | Auxin-induced protein 5NG4, putative                                |
| LOC_Os05g01580        | Integral membrane protein DUF6 containing protein, expressed        |
| LOC_Os05g01590        | Heat shock protein DnaJ, putative, expressed                        |
| LOC_Os05g01600        | Actin, putative, expressed                                          |
| LOC_Os05g01610        | FYVE zinc finger domain containing protein, expressed               |
| LOC_Os05g01620        | OsFBX155 - F-box domain containing protein, expressed               |
| LOC_Os05g01630        | OsFBX156 - F-box domain containing protein, expressed               |
| LOC_Os05g01635        | EP                                                                  |
| LOC_Os05g01640        | TE                                                                  |
| LOC_Os05g01650        | TE                                                                  |
| LOC_Os05g01660        | TE                                                                  |
| LOC_Os05g01670        | TE                                                                  |
| LOC_Os05g01675        | Photosystem I P700 chlorophyll a apoprotein A1, putative, expressed |
| LOC_Os05g01680        | RCLEA7 - Root cap and Late embryogenesis family protein precursor   |
| LOC_Os05g01690        | EP                                                                  |
| LOC_Os05g01700        | ABC transporter, ATP-binding protein, putative, expressed           |
| <b>LOC_Os05g01710</b> | <b>Transcription initiation factor IIA gamma chain, expressed</b>   |
| LOC_Os05g01730        | Drought induced 19 protein, putative, expressed                     |
| LOC_Os05g01750        | TruB family pseudouridylate synthase, putative, expressed           |
| LOC_Os05g01760        | Lysine ketoglutarate reductase trans-splicing related 1, putative   |
| LOC_Os05g01770        | TE                                                                  |
| <b>LOC_Os05g01780</b> | <b>STE kinase</b>                                                   |
| <b>LOC_Os05g01790</b> | <b>EP</b>                                                           |
| LOC_Os05g01810        | Xylem cysteine proteinase 2 precursor, putative, expressed          |
| LOC_Os05g01820        | Cytochrome b5-like Heme/Steroid binding domain containing protein   |
| LOC_Os05g01830        | EP                                                                  |
| LOC_Os05g01840        | HP                                                                  |
| LOC_Os05g01850        | TE                                                                  |
| LOC_Os05g01860        | EP                                                                  |
| LOC_Os05g01870        | HP                                                                  |
| LOC_Os05g01880        | EP                                                                  |
| LOC_Os05g01890        | EP                                                                  |
| LOC_Os05g01900        | EP                                                                  |
| LOC_Os05g01910        | Pumilio-family RNA binding protein, putative, expressed             |
| LOC_Os05g01920        | Inhibitor I family protein, putative, expressed                     |
| LOC_Os05g01940        | Zinc finger, RING-type, putative, expressed                         |
| LOC_Os05g01950        | EP                                                                  |
| LOC_Os05g01960        | EP                                                                  |
| LOC_Os05g01970        | NAD dependent epimerase/dehydratase family protein, putative        |
| LOC_Os05g01990        | DEAD-box ATP-dependent RNA helicase, putative, expressed            |
| LOC_Os05g01994        | Rab5-interacting protein like, putative, expressed                  |
| <b>LOC_Os05g02010</b> | <b>EP</b>                                                           |

---
