# Supplementary material for: Fine-Mapping the Wheat Snn1 Locus Conferring Sensitivity to the Parastagonospora nodorum Necrotrophic Effector SnTox1 Using an Eight Founder Multiparent Advanced Generation Inter-Cross Population
Source: PubMed Central journal article supplement (PMC4632045; doi:10.1534/g3.115.021584), 2015-09-24
Supplement: supp_g3.115.021584_TableS4.pdf [file supp_g3.115.021584_TableS4.pdf]

**Table S4** Wheat lines used to validate the KASP marker for SNP Excalibur\_c21898\_1423. KASP genotype scores are indicated: homozygous A nucleotide (A:A), homozygous G nucleotide (G:G), heterozygous (A:G). U = missing data. Note, the KASP marker assays polymorphism on the opposite strand relative to the marker on the iSelect 90k array.

|    | <b>Wheat Accession</b> | <b>KASP genotype</b> |
|----|------------------------|----------------------|
| 1  | STORM                  | A:A                  |
| 2  | FIELDER                | A:A                  |
| 3  | JACADI                 | A:A                  |
| 4  | POSIT                  | A:A                  |
| 5  | SAREK                  | A:A                  |
| 6  | RENOWN                 | A:A                  |
| 7  | VERSAILLES             | A:A                  |
| 8  | TALON                  | A:A                  |
| 9  | JENA                   | A:A                  |
| 10 | FENDA                  | G:G                  |
| 11 | RIEBESEL               | A:A                  |
| 12 | EPOCH                  | A:A                  |
| 13 | GLASGOW                | A:A                  |
| 14 | WINDSOR                | A:A                  |
| 15 | HIGHBURY               | A:A                  |
| 16 | PANORAMA               | G:G                  |
| 17 | BATSMAN                | A:A                  |
| 18 | BRIGAND                | A:A                  |
| 19 | MADRIGAL               | A:A                  |
| 20 | EXSEPT                 | A:A                  |
| 21 | ORESTIS                | A:A                  |
| 22 | GOLDLACE               | A:A                  |
| 23 | PIRANHA                | A:A                  |
| 24 | SHIRAZ                 | A:A                  |
| 25 | BUZZER                 | G:G                  |
| 26 | LANGDALE               | A:A                  |
| 27 | TUXEDO                 | A:A                  |
| 28 | RITMO                  | A:A                  |
| 29 | COCOON                 | A:A                  |
| 30 | KRANICH                | A:A                  |
| 31 | COMET                  | A:A                  |
| 32 | CYBER                  | A:A                  |
| 33 | TIMARU                 | A:A                  |
| 34 | LIMERICK               | G:G                  |
| 35 | DW930861-509           | U                    |
| 36 | TELLUS                 | A:A                  |
| 37 | DEAN                   | A:A                  |
| 38 | AXONA                  | G:G                  |
| 39 | OBELISK                | A:A                  |
| 40 | CONTENDER              | A:A                  |
| 41 | A13-98                 | A:A                  |
| 42 | JERICO                 | A:A                  |
| 43 | CAPRIMUS               | A:A                  |
| 44 | MARSHAL                | A:A                  |
| 45 | CONVOY                 | G:G                  |
| 46 | MAVERICK               | A:A                  |
| 47 | TRAVIX                 | A:A                  |
| 48 | ECLIPSE                | A:A                  |
| 49 | ABELE                  | A:A                  |
| 50 | WICKHAM                | A:A                  |
| 51 | EXPLOSIV               | A:A                  |
| 52 | SANCERRE               | A:A                  |
| 53 | PROPHET                | A:A                  |
| 54 | RUBENS                 | A:A                  |
| 55 | STIGG                  | A:A                  |

|    |               |     |
|----|---------------|-----|
| 56 | ORTON         | A:A |
| 57 | KWS_PODIUM    | G:G |
| 58 | AARDEN        | A:A |
| 59 | EDMUNDS       | A:A |
| 60 | ISIDOR        | A:A |
| 61 | KWS_TARGET    | A:A |
| 62 | HURLEY        | A:A |
| 63 | HAYDOCK       | A:A |
| 64 | CARSTENS_VIII | A:A |
| 65 | KIPLING       | A:A |
| 66 | PASTICHE      | A:A |
| 67 | CANADAIR      | A:A |
| 68 | GALAHAD       | A:A |
| 69 | FLAIR         | A:A |
| 70 | VISCOUNT      | A:A |
| 71 | SANDOWN       | A:A |
| 72 | Longbow       | A:A |
| 73 | NEWMARKET     | A:A |
| 74 | FENMAN        | A:A |
| 75 | WELLINGTON    | A:A |
| 76 | PHLEBAS       | G:G |
| 77 | NEXUS         | A:A |
| 78 | MAXWELL       | A:A |
| 79 | KWS_BOHINEN   | G:G |
| 80 | HUDSON        | A:A |
| 81 | DENMAN        | A:A |
| 82 | CANTERBURY    | A:A |
| 83 | MANDATE       | A:A |
| 84 | ANVIL         | A:A |
| 85 | NSL_WW13      | A:A |
| 86 | TEMPLE        | A:A |
| 87 | FRELON        | A:A |
| 88 | BROILER       | A:A |
| 89 | AVOCET        | U   |
| 90 | HARDI         | A:A |
| 91 | LAZARUS       | A:A |
| 92 | TADEPI        | A:A |
| 93 | SITKA         | A:A |
| 94 | OCHRE         | A:A |
| 95 | HAMMER        | A:A |

---
