# Supplementary material for: Fine-Mapping the Wheat Snn1 Locus Conferring Sensitivity to the Parastagonospora nodorum Necrotrophic Effector SnTox1 Using an Eight Founder Multiparent Advanced Generation Inter-Cross Population
Source: PubMed Central journal article supplement (PMC4632045; doi:10.1534/g3.115.021584), 2015-09-24
Supplement: supp_g3.115.021584_TableS5.pdf [file supp_g3.115.021584_TableS5.pdf]

**Table S5 Parental genotypic calls for significant genetic markers that co-segregate with the peak marker, Excalibur\_c21898\_1423.** Genotype calls with the lowest frequency in the eight founders are highlighted in grey. Kukri\_c37738\_417, the second most highly correlated of the twelve additional manually scored markers, is also included.

| No. | SNP                   | Chr. | cM    | $-\log_{10}P$ | Alchemy | Brompton | Claire | Hereward | Rialto | Robigus | Soissons | Xi19 |
|-----|-----------------------|------|-------|---------------|---------|----------|--------|----------|--------|---------|----------|------|
| 1   | Excalibur_c21898_1423 | 1B   | 8.361 | 55.29         | 2       | 2        | 2      | 2        | 2      | 2       | 0        | 0    |
| 2   | BS00093078_51         | 1B   | 8.361 | 54.12         | 0       | 0        | 0      | 0        | 0      | 0       | 2        | 2    |
| 3   | BS00026180_51a        | 1B   | 8.361 | 51.61         | 0       | 0        | 0      | 0        | 0      | 0       | 2        | 2    |
| 4   | Jagger_c5878_119      | 1B   | 8.361 | 24.19         | 0       | 2        | 0      | 0        | 2      | 0       | 2        | 2    |
| 5   | Kukri_c44369_131      | 1B   | 8.361 | 24.04         | 2       | 2        | 0      | 0        | 2      | 0       | 2        | 2    |
| 6   | BS00071333_51         | 1B   | 8.361 | 24.02         | 0       | 2        | 0      | 0        | 2      | 0       | 2        | 2    |
| 7   | BS00022504_51         | 1B   | 8.361 | 23.73         | 2       | 2        | 0      | 0        | 2      | 0       | 2        | 2    |
| 8   | RAC875_c24163_155     | 1B   | 8.361 | 23.32         | 2       | 2        | 0      | 0        | 2      | 0       | 2        | 2    |
| 9   | Excalibur_c10657_796  | 1B   | 8.361 | 8.70          | 0       | 0        | 0      | 0        | 0      | 0       | 2        | 0    |
| 10  | BS00050522_51         | 1B   | 8.361 | 8.11          | 2       | 2        | 0      | 2        | 2      | 2       | 2        | 0    |
| 11  | Kukri_c37738_417      | 1B   | 9.679 | 38.44         | 0       | 0        | 0      | 0        | 0      | 0       | 0        | 2    |
